1 **IF1 is a cold-regulated switch of ATP synthase**  
2 **to support thermogenesis in brown fat**  
3

4 Herver S. Brunetta<sup>1,2</sup>, Anna S. Jung<sup>2,3</sup>, Fernando Valdivieso-Rivera<sup>4</sup>, Stepheny C. C.  
5 Zani<sup>1</sup>, Joel Guerra<sup>2,3</sup>, Vanessa Furino<sup>4</sup>, Annelise Francisco<sup>5</sup>, Marcelo Berçot<sup>6</sup>, Pedro M.  
6 M. Moraes-Vieira<sup>6,7</sup>, Susanne Keipert<sup>8</sup>, Martin Jastroch<sup>8</sup>, Laurent O. Martinez<sup>9</sup>, Carlos H.  
7 Sponton<sup>4</sup>, Roger F. Castilho<sup>5</sup>, Marcelo A. Mori<sup>1,4,7</sup>, Alexander Bartelt<sup>2,3,10,11</sup>  
8

9 <sup>1</sup>Department of Biochemistry and Tissue Biology, University of Campinas, Campinas,  
10 Brazil; <sup>2</sup>Institute for Cardiovascular Prevention (IPEK), Faculty of Medicine, Ludwig-  
11 Maximilians-Universität München, Munich, Germany; <sup>3</sup>Institute for Diabetes and Cancer  
12 (IDC), Helmholtz Center Munich, Neuherberg, Germany; <sup>4</sup>Obesity and Comorbidities  
13 Research Center (OCRC), University of Campinas, Campinas, SP, Brazil; <sup>5</sup>Department  
14 of Pathology, University of Campinas, Campinas, SP, Brazil; <sup>6</sup>Department of Genetics,  
15 Evolution, Microbiology and Immunology, University of Campinas, Campinas, SP, Brazil;  
16 <sup>7</sup>Experimental Medicine Research Cluster (EMRC), University of Campinas, Campinas,  
17 SP, Brazil; <sup>8</sup>Department of Molecular Biosciences, The Wenner-Gren Institute,  
18 Stockholm University, Stockholm, Sweden; <sup>9</sup>LiMitAging team, Institute of Metabolic and  
19 Cardiovascular Diseases, I2MC UMR1297, IHU HealthAge, INSERM, University of  
20 Toulouse, Université Toulouse III - Paul Sabatier (UPS), Toulouse, France; <sup>10</sup>German  
21 Center for Cardiovascular Research, Partner Site Munich Heart Alliance, Munich,  
22 Germany; <sup>11</sup>German Center for Diabetes Research, Neuherberg, Germany.  
23

24 **Corresponding authors**

25 Alexander Bartelt – [alexander.bartelt@med.uni-muenchen.de](mailto:alexander.bartelt@med.uni-muenchen.de)

26 Marcelo A. Mori – [morima@unicamp.br](mailto:morima@unicamp.br)  
27

28 **Abstract**

29 While mechanisms controlling mitochondrial uncoupling protein-1 (UCP1) expression  
30 and function in thermogenic adipocytes play a pivotal role in non-shivering  
31 thermogenesis (NST), it remains unclear whether F<sub>1</sub>F<sub>o</sub>-ATP synthase function is  
32 regulated during NST. Here, we show that Inhibitory Factor 1 (IF1, encoded by *Atp5if1*),  
33 an inhibitor of ATP synthase hydrolytic activity, is a critical negative regulator of brown  
34 adipocyte energy metabolism. In mice, IF1 protein content is markedly diminished in  
35 brown adipose tissue (BAT) after 5 days of cold exposure. Additionally, the capacity of  
36 ATP synthase to generate mitochondrial membrane potential through ATP hydrolysis (the  
37 so-called “reverse mode” of ATP synthase) is higher in mitochondria isolated from cold-  
38 adapted mice compared to mice housed at room temperature. *In vitro*, IF1  
39 overexpression results in an inability of mitochondria to sustain mitochondrial membrane  
40 potential upon adrenergic stimulation and this occurs in a UCP1-dependent manner. In  
41 brown adipocytes, IF1 silencing is sufficient to increase mitochondrial lipid oxidation and  
42 the cellular dependency on glycolysis to produce ATP. Conversely, IF1 overexpression  
43 blunts mitochondrial respiration without causing cellular energetic stress, leading to a  
44 quiescent-like phenotype in brown adipocytes. In mice, adeno-associated virus-  
45 mediated IF1 overexpression in BAT suppresses adrenergic-stimulated thermogenesis  
46 and decreases mitochondrial respiration in this tissue. Taken together, our data shows  
47 that the downregulation of IF1 upon cold serves to facilitate the reverse mode of ATP  
48 synthase to enable energetic adaptation and effectively support NST in BAT.

49 **Graphical abstract**  
50

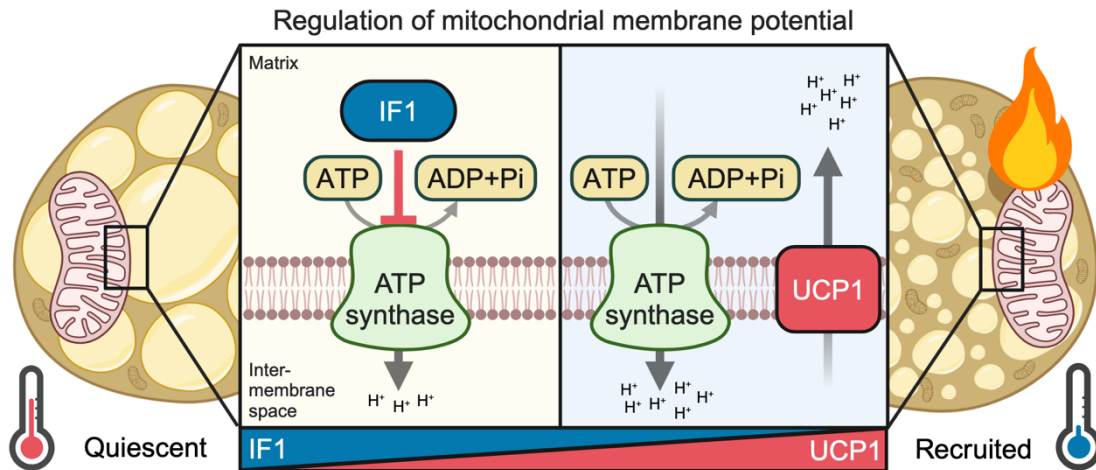

51  
52  
53  
54  
55  
56  
57  
58  
59

**Keywords:** Adipocytes, thermogenesis, UCP1, metabolism, mitochondria.

**Abbreviations:**

iBAT: interscapular brown adipose tissue; IF1: ATP synthase inhibitory factor 1; MMP: mitochondrial membrane potential; NST: non-shivering thermogenesis; PMF: protonmotive force; UCP1: uncoupling protein-1.

## 60 Introduction

61 One of the primary functions of brown adipose tissue (BAT) is generating heat through a  
62 process called non-shivering thermogenesis (NST) (Cannon and Nedergaard, 2004),  
63 which relies on the activation of uncoupling protein-1 (UCP1), a mitochondrial carrier  
64 protein that uncouples mitochondrial respiration from ATP synthesis. Activity of UCP1 is  
65 inhibited by purine nucleotides and stimulated by fatty acids, resulting in an increase in  
66 proton conductance across the inner mitochondrial membrane (Fedorenko et al., 2012;  
67 Fromme et al., 2018; Brunetta et al., 2020; Nicholls, 2021). Thus, activation of UCP1  
68 lowers the mitochondrial membrane potential (MMP), increases the activity of the  
69 electron transport chain, and enhances mitochondrial oxygen consumption. As a result,  
70 cold exposure and adrenergic activation of BAT lead to increased whole-body oxygen  
71 consumption and energy expenditure (Bartelt et al., 2011; Giroud et al., 2022; Politis-  
72 Barber et al., 2022).

73

74 Although the regulation of UCP1 is relatively well understood (Matthias et al., 1999;  
75 Cannon and Nedergaard, 2004; Nicholls, 2021; Chouchani, et al., 2019; Nicholls, 2023),  
76 less is known regarding the mechanisms controlling  $F_1F_0$ -ATP synthase (hereafter called  
77 ATP synthase) activity during NST. According to the chemiosmotic theory, the  
78 protonmotive force (PMF; proton electrochemical gradient) generated by the activity of  
79 the electron transport chain is coupled to ATP production by ATP synthase (Mitchell,  
80 1961). ATP synthase is a rotary motor protein catalyzing ATP synthesis from ADP and  
81 inorganic phosphate by using the PMF across the inner mitochondrial membrane. Under  
82 specific conditions, ATP synthase also functions as an ATPase (the so-called “reverse  
83 mode”), resulting in the formation of ADP plus  $P_i$  and leading to proton transport from the  
84 mitochondrial matrix into the intermembrane space (Kobayashi et al., 2023), thus  
85 restoring the PMF. Therefore, when PMF is high,  $F_0$  forcibly rotates  $F_1$ , resulting in ATP  
86 synthesis. Conversely, when PMF is low,  $F_1$  reverses the rotation and hydrolyzes ATP.  
87 Given the vectorial dependence of ATP synthase on the PMF, it is intriguing to investigate  
88 how ATP synthase would adapt following modulation of the electrical component of PMF  
89 (i.e., the mitochondrial membrane potential) upon UCP1 activation in brown adipocytes.

90

91 Located in the mitochondrial matrix, ATP synthase inhibitory factor 1 (encoded by  
92 *Atp5if1*, hereafter called IF1), is activated when mitochondrial matrix pH is low, resulting  
93 in the inhibition of ATP synthase hydrolytic activity by operating in the reverse mode  
94 (Pullman and Monroy, 1963; Cabezón et al., 2003; Gledhill et al., 2007; Esparza et al.,  
95 2017). This mechanism supposedly prevents cellular ATP depletion by mitochondria.  
96 However, it is now recognized that under certain conditions, such as low MMP or  
97 mitochondrial dysfunction, the reverse mode of ATP synthase is potentiated, generating  
98 MMP at the cost of mitochondrial ATP consumption (Chen et al., 2014; Nelson et al.,  
99 2021; Acin-perez et al., 2023). Therefore, the role of IF1 controlling ATP synthase  
100 function appears to be more relevant to regulating cellular energy metabolism than  
101 previously anticipated (Chen et al., 2014; Formentini et al., 2017; Sánchez-González et  
102 al., 2020; Zhou et al., 2022). However, it remains to be determined if IF1 plays a role in  
103 BAT energy metabolism during NST. Here, we investigated the role of IF1 in BAT  
104 thermogenic capacity and metabolism by applying *in vitro* and *in vivo* gain and loss-of-  
105 function experiments in brown adipocytes and mice. In summary, we establish IF1  
106 downregulation as a key adaptative mechanism to modulate brown adipocyte energy  
107 metabolism during NST.

## 108 **Methods**

109

### 110 *Animals and indirect calorimetry*

111 All experiments were performed following institutional guidelines and approved by the  
112 Animal Ethical Committee at the University of Campinas (5929-1/2021) and the  
113 government of Upper Bavaria, Germany (Protocol number 02-21-160) and performed in  
114 compliance with German Animal Welfare Laws. For *in vivo* experiments, male C57BL/6J  
115 mice (12-15 weeks old) were randomly divided into room temperature (22 °C) or cold  
116 exposure (4 °C) groups for 3 or 5 days. After each experimental protocol, mice were  
117 anesthetized with ketamine and xylazine (360 mg/kg and 36 mg/kg, respectively) and  
118 once the absence of reflex was confirmed, tissues were harvested followed by cervical  
119 dislocation. All animals were housed on 12 h light:dark cycle with 24-hour access to chow  
120 diet and water *ad libitum* (diet PRD00018 Nuvilab, Suzano, Brazil). To generate mice  
121 lacking IF1, encoded by the *Atpif1* gene, we acquired *Atpif1* knockout mice  
122 (*Atpif1*<sup>tm1a(EUCOMM)Wtsi</sup>) from the European Mouse Mutant Archive (EMMA), a component  
123 of the International Mouse Phenotyping Consortium (IMPC). This *Atpif1* tm1a allele is  
124 flanked by FRT and loxP sites. To produce whole-body IF1 knockout (IF1 KO) mice,  
125 offspring carrying the *Atpif1* tm1a allele were crossed with mice expressing a global Cre-  
126 deleter strain ( $\beta$ -actin Cre) on a C57BL/6 background to delete exon 3 and generate the  
127 *Atpif1*<sup>tm1b</sup> allele (KO). Whole-body IF1 KO male mice were kept at either room  
128 temperature (23 °C) for 3-4 weeks or thermoneutrality (28 °C) for two weeks. Food intake  
129 and body weight were determined weekly and after the end of the adaptation period,  
130 whole-body oxygen consumption as well as CL-316,243-induced adrenergic (1 mg/kg of  
131 body weight) response was measured using indirect calorimetry. Resting and CL-  
132 316,243-induced oxygen consumption was indirectly measured using Sable Systems  
133 Promethion Indirect Calorimetry System (Kotschi et al., 2022). For animals with IF1  
134 overexpression in BAT (see protocol below), 3 weeks after surgery, resting oxygen  
135 consumption (VO<sub>2</sub>) and carbon dioxide production (VCO<sub>2</sub>) were monitored in metabolic  
136 cages (Columbus Instruments, Columbus, OH, USA) at 22 °C (Brunetta et al., 2020).  $\beta_3$ -  
137 adrenergic agonist-mediated energy expenditure was measured for 3 h or iBAT-  
138 dependent heat production for 10 min after CL316,243 (1 mg/kg of body weight)  
139 intraperitoneal injection during the light cycle of the animal at 22 °C.

140

### 141 *AAV production and IF1 overexpression in BAT*

142 The AAV plasmid for IF1 overexpression was acquired from Origene Technologies GmbH  
143 (Reference CW309970). AAV packaging, titration, and injection into BAT were performed  
144 according to a previous study (Valdivieso-Rivera et al., 2023). Briefly, AAVs were  
145 produced by triple transfection of Adeno-X 293 cells (Takarabio) with the targeting vector  
146 plasmid, the pAdDeltaF6 plasmid (Addgene #112867), and the pAAV2/8 plasmid  
147 (Addgene # 112864) using polyethylenimine (1  $\mu$ g/ $\mu$ l) (Sigma-Aldrich, 408727). The cells  
148 were collected by scratching the plates 72 h post-transfection and filtered using an  
149 Amicon Ultra-0.5 centrifugal filter (Merck Millipore, UFC510024). Extraviral DNA was  
150 removed by digestion with DNase I (Thermo Scientific, EN0521) and the viral particles  
151 were released through lysis of the cells. Finally, the virus titer was quantified using  
152 quantitative polymerase chain reaction (qPCR) with SYBR Green Master Mix (Thermo  
153 Scientific, 4309155) and primers targeting ITRs (Supplementary Table 1). Experiments  
154 with IF1 overexpression in BAT were carried out using male C57BL/6J mice, provided by  
155 Multidisciplinary Center for Biological Research (University of Campinas). Mice were 15-  
156 17 weeks old when adeno-associated virus (AAV) was injected into the interscapular BAT

157 depot. 2 weeks after AAV injection, indirect calorimetry was performed followed by  
158 intraperitoneal CL316,243 injection (described above) before exposing animals to cold  
159 exposure (4 °C) for 5 days. All animals were housed at the Institute of Biology animal  
160 facility on 12 h light:dark cycle with 24 h access to chow diet and water *ad libitum* (diet  
161 PRD00018 Nuvilab, Suzano, Brazil). Mice were anesthetized with 1-2 % isoflurane using  
162 a Vaporizer AI-100 (Insight Ltda). A 0.3-0.8 cm longitudinal incision was made in the skin  
163 at the interscapular region to expose the BAT. Thirty microliters of AAV ( $2 \times 10^{11}$  vector  
164 genomes) were administered in both lobes (10 injections of 3  $\mu$ L each in different  
165 anatomical spots) of the interscapular BAT depot of mice using a Hamilton syringe.  
166 Following the injections, IPTT-300 Temperature Transponders (PLEXX, 11059) were  
167 placed onto the interscapular BAT. After the surgery, mice were sutured with surgical  
168 strain and received ibuprofen diluted via drinking water (1 mg/ml) for 5 days. BAT  
169 temperature was monitored daily using the transponders.  
170

#### 171 *F<sub>o</sub>F<sub>1</sub>-ATP synthase hydrolytic activity*

172 F<sub>o</sub>F<sub>1</sub>-ATPase activity was measured in total BAT homogenates using a  
173 spectrophotometric method adapted from a previous publication (Petrick et al., 2022).  
174 Briefly, 190  $\mu$ L of reaction buffer containing 200 mM KCl, 20 mM HEPES, 10 mM NaN<sub>3</sub>,  
175 1 mM EGTA, 15 mM MgCl<sub>2</sub>, and 10 mM phosphoenolpyruvate (pH 8) was added to a  
176 96-well plate. Immediately before the reaction, 18 U/mL lactate dehydrogenase, 18 U/mL  
177 pyruvate kinase, 10  $\mu$ L BAT homogenate, and 0.2 mM NADH were added to the well for  
178 a final volume of 0.2 mL. Assays were performed in triplicates at 37 °C and 340 nm  
179 wavelength. F<sub>o</sub>F<sub>1</sub>-ATPase synthase hydrolytic activity was measured after the addition  
180 of 5 mM ATP. The slope of NADH disappearance after 5 min of reaction was used to  
181 calculate F<sub>o</sub>F<sub>1</sub>-ATPase activity and averaged among the triplicates. To assure F<sub>o</sub>F<sub>1</sub>-  
182 ATPase synthase activity, we used wells with the addition of oligomycin 1  $\mu$ g/mL (F<sub>o</sub>-  
183 ATP synthase inhibitor), or in the absence of ATP or Mg<sup>2+</sup> (cofactor necessary for F<sub>o</sub>F<sub>1</sub>-  
184 ATPase function).  
185

#### 186 *Mitochondrial isolation*

187 Interscapular BAT mitochondria were isolated using differential centrifugation as  
188 previously described (Brunetta et al., 2022). Tissues were harvested, minced in isolation  
189 buffer (100 mM sucrose, 100 mM KCl, 50 mM Tris-HCl, 1 mM KH<sub>2</sub>PO<sub>4</sub>, 0.1 mM EGTA,  
190 0.2 % BSA, and 1 mM ATP; pH 7.4), weighed, and manually homogenized using a Teflon  
191 pestle. Whole-tissue homogenate was centrifuged at 800 g for 10 min, resuspended in  
192 4 mL of isolation buffer, and immediately spun at 5000 g for 5 min. The pellet was  
193 repeatedly resuspended in respiration buffer (0.5 mM EGTA, 3 mM MgCl<sub>2</sub>·6H<sub>2</sub>O, 60 mM  
194 K-lactobionate, 10 mM KH<sub>2</sub>PO<sub>4</sub>, 20 mM HEPES, 20 mM taurine, 110 mM sucrose, 1 g/L  
195 free acid-free BSA; pH 7.1) and pelleted at 10,000 g for 10 min. After protein  
196 quantification, 50  $\mu$ g of mitochondrial protein was used to determine MMP.  
197

#### 198 *ATP-supported mitochondrial membrane potential ( $\Delta\psi$ ) estimation*

199 MMP was determined using 5  $\mu$ M safranin-O dye added to the reaction medium as  
200 previously described (Francisco et al., 2018). Briefly, mitochondria isolated from BAT of  
201 room temperature or cold-exposed mice were incubated in the presence of antimycin A  
202 and GDP to inhibit flux through respiratory complex III and UCP1, respectively. After  
203 signal stabilization, ATP was added to the media to stimulate the reverse mode of ATP  
204 synthase and membrane potential generation. Oligomycin was used as a control of  
205 specificity. Data are present as % of baseline signal obtained by safranin O fluorescence.



## 206 *Cell culture*

207 Brown preadipocyte cells WT1 were cultured at 37 °C, 5 % CO<sub>2</sub>, in DMEM GlutaMax  
208 growth medium (Thermo Fisher, cat. Num. 31966) containing 10 % fetal bovine serum  
209 (FBS, Sigma-Aldrich) and 1 % penicillin/streptomycin (Sigma-Aldrich) and differentiated  
210 as previously described (Willemsen et al., 2022). Briefly, upon confluence, cells were  
211 differentiated from mature adipocytes by the addition of 1 μM rosiglitazone (Cayman  
212 Chemicals), 1 nM triiodothyronine (T3) (Sigma-Aldrich), 850 nM human insulin (Sigma),  
213 500 nM 3-isobutyl-1-methylxanthine (IBMX, Sigma-Aldrich), 1 mM dexamethasone  
214 (Sigma-Aldrich), and 125 nM indomethacin (Sigma-Aldrich) for 48 h, after which the  
215 medium was changed to a growth medium containing only rosiglitazone, T3, and insulin  
216 with this medium being renewed every 2 days.

## 217 218 *Primary brown adipocytes culture*

219 Primary brown adipocytes were obtained from interscapular brown adipose tissue of 6-  
220 8 week-old C57BL/6N male mice. After collection of intrascapular BAT, tissues were  
221 minced and digested using 2 mg/ml collagenase at 37 °C under continuous agitation.  
222 Then, cells were filtered using 100 μm and 70 μm cell strainers and cultured at 37°C, 5%  
223 CO<sub>2</sub>, in F12 media containing 10 % FBS (Sigma-Aldrich), and 1 % penicillin/streptomycin  
224 (Sigma-Aldrich) until confluence. Upon confluence, cells were induced to differentiation  
225 by the addition of 1 μM rosiglitazone (Cayman Chemicals), 1 nM T3 (Sigma-Aldrich),  
226 850 nM human insulin (Sigma), 500 nM IBMX (Sigma-Aldrich), and 1 mM  
227 dexamethasone (Sigma-Aldrich) for 48 h, after which the medium was changed to a  
228 growth medium containing only rosiglitazone, T3, and insulin with this medium being  
229 renewed every 2 days. Experiments in both cell lines were carried out on day 6 of the  
230 differentiation protocol. Acute norepinephrine treatment was carried out by diluting  
231 norepinephrine to a 10 μM final concentration and treating the cells for 30 min. After that,  
232 immunoblots, membrane potential, or cellular ATP content were determined.

## 233 234 *In vitro IF1 gain- and loss-of-function experiments*

235 For the loss-of-function experiments, knockdown was achieved by using SMARTpool  
236 siRNA (Dharmacon). Transfection was performed on day 4 of differentiation using  
237 LipofectamineRNAiMAX transfection reagent (Thermo Fisher) and siRNA targeting  
238 *Atp5if1* and/or *Ucp1* at a concentration of 30 nM. SiScrambled was used as a control for  
239 silencing experiments. For the gain-of-function experiments, TOP10 competent bacteria  
240 were transformed by mixing 1 μl of *Atp5if1\_pcDNA3.1+/C-(K)-DYK* plasmids and  
241 keeping them for 30 s at 42 °C. After that, bacteria were grown at 37 °C for 1.5 h and  
242 then streaked onto an agar plate containing ampicillin (100 μg/ml) and grown overnight  
243 also at 37 °C. In the next day, a single colony was picked and inoculated into 5 mL LB  
244 medium with 100 μg/mL ampicillin. In the evening, 1 mL of the day culture was  
245 transferred into 400 mL LB medium with ampicillin for overnight culture at 37 °C,  
246 200 rpm. Maxiprep was performed according to the manufacturer's instructions  
247 (NucleoBond® Xtra Maxi Plus EF, Macherey-Nagel), and, after elution, DNA  
248 concentration was determined with Nanodrop and diluted to 1 μg/μl. Cells were  
249 transfected with the plasmid using TransIT-X2 diluted in Opti-MEM I Reduced-Serum  
250 Medium according to the manufacturer's instructions. In the next day, cell medium was  
251 replaced and cells were incubated for another 24 hours before the experiments. p-MXs-  
252 IF1(E55A) mutation was generated by David Sabatini's group and deposited at AddGene  
253 (cat. Number #85404). The details of the mutation generation can be found elsewhere  
254 (Chen et al., 2014).

255 *Mitochondrial membrane potential ( $\Delta\psi$ ) determination in intact cells*

256 To determine mitochondrial membrane potential, 20,000 differentiated WT1 cells were  
257 seeded onto a well of a 96-well plate. 24 h after transfection, media was changed and  
258 kept for another 24 h. Then, cells were treated with 10  $\mu$ M norepinephrine for 30 min  
259 and, after that, stained with 20 nM TMRM for 30 min (Abcam, ab228569) according to  
260 the instructions of the manufacturer. Following incubation, cells were washed with  
261 imaging buffer (Abcam, ab228569) and imaged using a Tecan plate reader at wavelength  
262 excitation/emission = 548/575 nm, respectively. Fluorescence was normalized relative to  
263 non-treated scrambled or empty vector cells in the absence of norepinephrine.

264

265 *ATP levels and ATP/ADP ratio determination*

266 Resting cellular ATP levels were determined in differentiated WT1 cells by luminescence  
267 (Luminescent ATP detection kit, Abcam, ab113849). Cells were transfected as previously  
268 described. Thereafter, media was washed off and cells were incubated with lysis buffer  
269 for 5 min under constant agitation (300 rpm). Then, ATP detection reaction buffer was  
270 added, and the samples were read in a Tecan plate reader according to the instructions  
271 of the manufacturer. Luminescence values were plotted against a standard curve  
272 provided by the manufacturer. To estimate ADP content, 100  $\mu$ M dCTP (Sigma-Aldrich,  
273 cat. Num. 11934520001) and 5 U/ml nucleoside 5-diphosphate kinase (Sigma-Aldrich,  
274 cat. Num. N2635) were added, and luminescence was read again after 10 min (Ruas et  
275 al., 2018).

276

277 *Cellular oxygen consumption and extracellular acidification rate*

278 Mitochondrial respiration was measured using Seahorse Cell Mito Stress Test (Agilent)  
279 with some adjustments to the manufacturer's protocol. Briefly, primary differentiating  
280 brown adipocytes were seeded onto a 24-well Seahorse plate on the fourth day of  
281 differentiation. After transfection, culture medium was replaced with Seahorse medium  
282 (XF DMEM pH 7.4, 10 mM glucose, 1 mM pyruvate, 2 mM L-glutamine). To determine  
283 fatty-acid-supported respiration, Seahorse medium was supplemented with 100  $\mu$ M  
284 palmitate dissolved in 1 % free-fat acid-BSA (Sigma-Aldrich, cat. Num. A8806) while  
285 other substrates (i.e. glucose, pyruvate, glutamate) were not added to the respiration  
286 media. Cells were incubated for 60 min at 37 °C without CO<sub>2</sub> before being placed in the  
287 Seahorse Analyzer XFe24 instrument. When indicated, 10  $\mu$ M etomoxir (Sigma-Aldrich,  
288 cat. Num. 236020) was added in this step into the medium. In the assay, the cells were  
289 treated with norepinephrine (Sigma-Aldrich, cat. Num. A0937) (final concentration in the  
290 well was 1  $\mu$ M), oligomycin (1  $\mu$ M), FCCP (2  $\mu$ M), and rotenone/antimycin A (0.5  $\mu$ M)  
291 (Sigma-Aldrich, cat. Num. 75351, C2920, 557368, and A8674, respectively). The  
292 reagents were mixed for 3 min, followed by 3 min incubation, and 3 min measurement.  
293 Total protein was measured for normalization using BCA assay (ThermoFisher, cat. Num.  
294 23225) according to the manufacturer's instructions. To test the effects of FFA-induced  
295 by lipolysis on mitochondrial uncoupling independent of UCP1, mitochondrial respiration  
296 was also determined in Seahorse medium (as described before) with the addition of 2 %  
297 fatty acid-free BSA, as previously published (Li et al., 2014). Mitochondrial respiration in  
298 BAT from IF1 overexpressing mice was determined in saponin-permeabilized adipose  
299 tissue in a 2 mL chamber of an Oxygraph high-resolution respirometer chamber with  
300 2 mL MiR05 at 37 °C as previously described with minor modifications (Brunetta et al.,  
301 2020). Briefly, BAT was excised and immediately placed in 1 ml of BIOPS (2.77 mM  
302 CaK<sub>2</sub>-EGTA, 7.23 mM K<sub>2</sub>-EGTA, 5.77 mM Na<sub>2</sub>-ATP, 6.56 mM MgCl<sub>2</sub>·6H<sub>2</sub>O, 15 mM Na<sub>2</sub>-

303 PCr, 20 mM imidazole, 0.5 mM dithiothreitol, and 50 mM MES). After that, a small piece  
304 was weighed (~2-4 mg of wet tissue) and minced with scissors. Tissues fragments were  
305 then transferred to 2 mL of MiR05 buffer (0.5 mM EGTA, 3 mM MgCl<sub>2</sub>·6H<sub>2</sub>O, 60 mM K-  
306 lactobionate, 10 mM KH<sub>2</sub>PO<sub>4</sub>, 20 mM HEPES, 20 mM taurine, 110 mM sucrose, 1 g/L  
307 FA-free BSA; pH 7.1) and oxygen consumption was by high-resolution respirometry  
308 (Oroboros Oxygraph-2k, Innsbruck, Austria) in the presence of saponin (40 µg/mL). BAT  
309 mitochondrial oxygen O<sub>2</sub> consumption was tested by sequentially adding 5 mM pyruvate  
310 + 2 mM malate, 10 mM succinate; 2 mM GDP was used to inhibit uncoupling protein 1  
311 (UCP1), and 2 mM ADP to test the contribution of oxidative phosphorylation (OxPhos)  
312 after artificially coupling mitochondria with GDP.  
313

#### 314 *Estimation of glucose-dependent ATP production*

315 Glycolytic and oxidative ATP supply rates were estimated from cellular oxygen  
316 consumption and medium acidification in an Agilent Seahorse XF Analyzer as described  
317 in full detail by others (Mookerjee et al., 2017), assuming that cellular energy metabolism  
318 was fueled exclusively by glucose and no proton leak is found either in the inner  
319 mitochondrial membrane during oxidative phosphorylation or in other mitochondrial  
320 processes (i.e. tricarboxylic acid cycle, NAD(P)(H) cycles). For that, we supplemented  
321 our media only with glucose. Sequential injections were made as follows: glucose (final  
322 concentration 10 mM), oligomycin (1 µM), and rotenone/antimycin A (0.5 µM). Glycolytic  
323 and oxidative phosphorylation ATP supply were calculated in the presence of glucose  
324 after subtracting oxygen consumption rate and extracellular acidification rate from  
325 oligomycin and rotenone/antimycin A injection. After the experiment, total protein was  
326 measured for normalization using BCA assay (ThermoFisher) according to the  
327 manufacturer's instructions.  
328

#### 329 *Glycerol release*

330 Glycerol concentration in the media was used as a surrogate for lipolysis. Glycerol  
331 release was measured at baseline and upon adrenergic stimulation with norepinephrine  
332 as previously reported (Willemsen et al., 2022). Briefly, we used Free Glycerol Reagent  
333 (Sigma-Aldrich, F6428) and Glycerol standard solution (Sigma-Aldrich, G7793) to  
334 measure free glycerol concentrations in the cell culture supernatant. We replaced the  
335 culture medium and then collected the new one after 90 min (baseline condition); then  
336 we replaced it with a new culture medium in the presence of 1 µM norepinephrine for  
337 another 90 min. The kit was used according to the manufacturer's instructions. Fold  
338 change was calculated by the ratio between norepinephrine-stimulated glycerol release  
339 and the baseline glycerol values within each well.  
340

#### 341 *Oil-Red-O staining*

342 We used Oil-Red-O (ORO) staining to measure lipid content in adipocytes. Cells were  
343 washed with DPBS (Gibco), and fixed in zinc formalin solution (Merck) for 60 min at room  
344 temperature. ORO working solution was prepared (60 % v/v Oil-Red-O solution (Sigma-  
345 Aldrich), 40% v/v H<sub>2</sub>O) and filtered twice through a funnel with filter paper. After the  
346 incubation time, zinc formalin was carefully removed and cells were washed with H<sub>2</sub>O.  
347 60 % isopropanol was added and incubated for 5 min. Then, isopropanol was aspirated  
348 and ORO working solution was added and incubated for 5min. Cells were again rinsed  
349 with H<sub>2</sub>O and then counterstained with hematoxylin for 1min. After rinsing with water,  
350 wells were kept wet until imaging under the microscope to prevent lipid droplet disruption.  
351



352 *RNA extraction, cDNA synthesis, and qPCR*

353 Total RNA extraction was performed using the NucleoSpinRNA kit (Macherey-Nagel) as  
354 specified by the manufacturer. Cells were lysed in TRIzol (Thermo Fisher) using and  
355 mixed with chloroform at 1:5 v/v ratio (chloroform:TRIzol), samples were then  
356 centrifuged, and the supernatant transferred into the purification columns of the  
357 NucleoSpinRNA kit. All further steps were executed as specified by the manufacturer.  
358 cDNA was synthesized with Maxima H Master Mix 5 (Thermo Fisher) using 500 ng of  
359 total RNA. Gene expression was evaluated by qPCR using PowerUpSYBR Green  
360 Master Mix (Thermo Fisher) according to the manufacturer's instructions. Primers are  
361 listed in Supplementary Table 1. Expression was normalized to *Tbp* by the  $\Delta\Delta$ ct-method.  
362

363 *Immunoblots*

364 The samples were lysed in RIPA buffer [50 mM Tris (Merck), pH 8, 150 mM NaCl (Merck),  
365 5 mM EDTA (Merck), 0.1 % w/v SDS (Roth), 1 % w/v IGEPALCA-630 (Sigma), 0.5 % w/v  
366 sodium deoxycholate (Sigma-Aldrich)] freshly supplemented with protease inhibitors  
367 (Sigma) in a 1:100 v:v ratio and phosStop phosphatase inhibitors (Roche). Cell lysates  
368 were centrifuged for 15 min (4 °C, 12,000g) and tissue lysates were centrifuged twice for  
369 15 min, 6000 g at 4 °C before the supernatant was collected. Protein concentrations  
370 were determined using the Pierce BCA assay (Thermo) according to the manufacturer's  
371 instructions. Protein samples were denatured with 5 % v/v 2-mercaptoethanol (Sigma)  
372 for 5 min at 95 °C before they were loaded in gradient Bolt Bis-Tris gels (Thermo). After  
373 separation, proteins were transferred onto a 0.2 mm PVDF membrane (Bio-Rad) using  
374 the Trans-BlotTurboSystem (Bio-Rad) at 27 V, 1.4 A for 7 min. The membrane was  
375 blocked in Roti-Block (Roth) for 1 h at room temperature. The membranes were  
376 incubated overnight in primary antibody (Supplementary Table 2) in 5 % BSA-TBST at  
377 4 °C. After washing with TBST [200 mM Tris (Merck), 1.36 mM NaCl (Merck), 0.1 % v/v  
378 Tween20 (Sigma)], the membranes were incubated in secondary antibody (Santa Cruz)  
379 solutions (1:10,000 in Roti-block) for 1 h at room temperature. Membranes were washed  
380 in TBST and imaged using SuperSignal West Pico PLUS Chemiluminescent Substrate  
381 (Thermo) in a Chemidoc (Bio-Rad) and analyzed using ImageJ ([www.imagej.nih.gov](http://www.imagej.nih.gov)).  
382 Of note, we noticed a difference in the migration pattern of IF1 when using commercial  
383 gels (Thermo, cat. Num. NP0326BOX) compared to custom-made ones (0.37 M Tris-  
384 Base, 15 % acrylamide/Bis v/v, 1 % SDS v/v, pH 8.8). When using pre-made commercial  
385 gels, IF1 appears between 12-15 kDa whereas in homemade gels, IF1 appears between  
386 15-17 kDa. Given the same antibody against IF1 was used throughout the entire study,  
387 this difference explains a slight shift in the molecular weight appearance in our  
388 experiments. Uncropped blots can be found in Supplementary Fig. 1.  
389

390 *Statistical analysis*

391 Data are shown as individually or mean  $\pm$  standard deviation (SD). Outliers were  
392 removed when the observation was greater than 2 times the SD within the same group.  
393 Comparisons between two groups were made using a two-tailed Student's t-test while  
394 comparisons of three groups were done by using one-way ANOVA followed by LSD post-  
395 hoc test. When two levels were tested (i.e., treatment vs. IF1 manipulation) two-way  
396 ANOVA followed by LSD post-hoc test was used. Post-hoc tests were only applied once  
397 an interaction between conditions was found, otherwise, a main effect of one of the two  
398 conditions is reported. Analysis was performed using GraphPad Prism (La Jolla, CA,  
399 USA). Statistical difference was considered when  $P < 0.05$ , indicated by asterisks in the  
400 figures.

## 401 **Results**

402

### 403 **Cold exposure potentiates the reverse mode of ATP synthase in brown fat**

404 While the adaptive regulation of mitochondrial uncoupling in BAT upon cold exposure is  
405 well studied, it remains unclear whether the activity of ATP synthase is regulated to  
406 support NST. To test this, we first evaluated the hydrolytic activity of ATP synthase  
407 operating in the reverse mode in BAT from mice exposed to 4 °C for 5 days. As expected,  
408 cold-exposed mice lost body mass despite greater food intake compared to mice kept at  
409 room temperature (RT, 22 °C) (Figure EV1A,B). We observed that ATP hydrolysis was  
410 low in BAT from animals kept at RT; however, cold exposure increased it by almost 2-  
411 fold (Fig. 1A,B). In the absence of ATP or Mg<sup>2+</sup>, or in the presence of oligomycin, a  
412 classical inhibitor of F<sub>0</sub>F<sub>1</sub>-ATP synthase, ATP hydrolysis was negligible, confirming the  
413 specificity of the assay to measure the hydrolytic activity of ATP synthase (Fig. 1A). In  
414 intact mitochondria, the primary consequence of ATP hydrolysis by ATP synthase is  
415 pumping protons from the mitochondrial matrix into the intermembrane space. Therefore,  
416 we tested the impact of the reverse mode of ATP synthase on MMP in isolated  
417 mitochondria from BAT. For that, we isolated mitochondria from the BAT of mice kept at  
418 RT or exposed to cold (Fig. 1C) and measured MMP using the fluorescent probe safranin  
419 (Fig. 1D). We added antimycin A (to inhibit Complex III) and GDP (to inhibit UCP1) to  
420 minimize proton movement across the inner mitochondrial membrane from sources other  
421 than ATP synthase activity itself. Then, we added ATP in the medium to drive ATP  
422 synthase into the reverse mode, resulting in the generation of ADP and Pi and the  
423 pumping of protons from the mitochondrial matrix into the intermembrane space. As  
424 expected, ATP addition caused an increase in MMP (Fig. 1D), and this occurred in an  
425 oligomycin-sensitive manner. However, this increase was larger in mitochondria isolated  
426 from BAT of cold-exposed mice (Fig. 1E). In summary, this set of data shows that cold  
427 exposure increases the capacity of ATP synthase to function in the reverse mode in BAT.  
428

### 429 **Cold exposure lowers IF1 levels in BAT**

430 IF1 is known to inhibit the hydrolytic activity of ATP synthase in conditions when MMP is  
431 low or when the mitochondrial matrix becomes too acidic (Cabezon et al., 2000).  
432 Therefore, we hypothesized that IF1 could be involved in the regulation of ATP synthase  
433 in BAT following cold exposure. When analyzing three different tissues rich in  
434 mitochondria (i.e., BAT, liver, and heart), we observed that BAT is distinguished by  
435 relatively higher levels of IF1 when compared to proteins that compose other  
436 mitochondrial respiratory complexes (Fig. 1F,G). Stoichiometrically, this suggests that  
437 IF1 may exert a more profound inhibitory effect over ATP synthase function in BAT  
438 compared to liver or heart tissue. We then examined *Atp5if1* mRNA levels in BAT of a  
439 different cohort of mice acutely (4 h) exposed to cold or  $\beta_3$ -adrenergic agonist CL316,243  
440 and found that *Atp5if1* mRNA abundance was lower by approximately 50 % following  
441 either stimulus (Fig. 1H). Accordingly, we observed that IF1 protein amount was  
442 downregulated by ~50 % and ~80 % following 3 and 5 days of cold exposure,  
443 respectively (Fig. 1I,J). Importantly, ATP synthase subunit 5A levels were not changed  
444 by cold exposure (Fig. 1I), which suggests that changes in IF1/ATP synthase ratio upon  
445 cold exposure (Fig. 1K) are primarily determined by the downregulation of IF1. Of note,  
446 cold exposure did not affect IF1 levels in liver and heart (Fig. 1C,D), indicating a BAT-  
447 specific mechanism. In addition, given the marked remodeling mitochondria undergo in  
448 BAT following changes in ambient temperature, we also tested IF1 regulation when mice  
449 are transferred from RT (22 °C) to thermoneutrality (28 °C) exposure. While UCP1 and

450 complex I subunit NDUFB8 were markedly lower following thermoneutrality adaptation  
 451 for 3 and 7 days, IF1 levels remained stable (Fig. 1L), suggesting modulation of IF1  
 452 levels is specific to BAT adaptation to cold when mice heavily rely on NST (i.e., 4 °C).  
 453 Together, these findings suggest that the reduction of IF1 protein levels after cold  
 454 exposure is linked to the greater hydrolytic activity by ATP synthase found in BAT  
 455 mitochondria from cold-adapted mice (Fig. 1M).

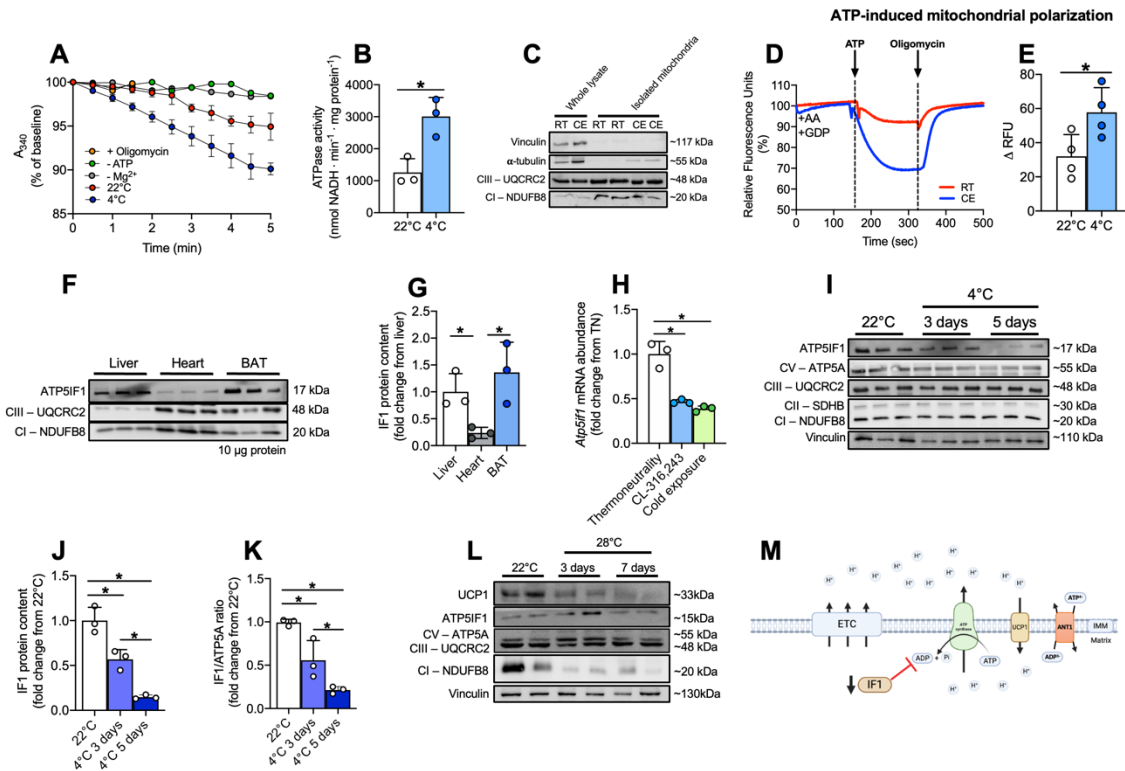

456  
 457 **Fig. 1: Cold favors the reverse mode of ATP synthase and lowers IF1 levels in BAT.**  
 458 (A) Representative traces of NADH consumption to determine the hydrolytic capacity of ATP  
 459 synthase and (B) quantification of ATPase activity in BAT from room temperature (RT, 22 °C) or  
 460 cold-exposed (4 °C) mice. (C) Representative immunoblots showing low content of cytosolic  
 461 proteins in our mitochondrial isolation protocol. (D) Representative plots of safranin fluorescence  
 462 in mitochondria isolated from RT or cold-exposed mice in response to ATP addition and (E)  
 463 quantification of the ATP-induced change in membrane potential. (F) Representative images and  
 464 (G) quantification of IF1 protein levels in liver, heart, and BAT of mice kept at RT. (H) *Atp5if1*  
 465 mRNA levels in BAT of thermoneutrality-adapted mice, 4 hours after cold exposure or CL316,243  
 466 injection. (I) Representative images and (J) quantification of IF1 in BAT following 3 or 5 days of  
 467 cold exposure. (K) IF1/ATP5A ratio in BAT of animals kept in RT, and 3 or 5 days of cold exposure.  
 468 (L) Representative blots of mitochondrial proteins from animals kept at RT and exposed to  
 469 thermoneutrality (TN) for 3 and 7 days. (M) Schematic model of the hypothetical relationship  
 470 between IF1 and UCP1 in brown adipocytes (created with Biorender). A<sub>340</sub> – 340 nm absorbance;  
 471 ANT – adenine nucleotide transporter; ATP – adenosine triphosphate; ADP – adenosine  
 472 diphosphate; Mg<sup>2+</sup> - magnesium; AA – Antimycin A; CE – cold exposure; ATP5IF1 – ATP synthase  
 473 inhibitory factor subunit 1; BAT – brown adipose tissue; CIII – complex III; CI – complex I; ETC –  
 474 electron transport chain; GDP – guanosine diphosphate; IF1 – inhibitory factor 1; NADH – reduced  
 475 nicotinamide adenine dinucleotide; RFU – relative fluorescence units; RT – room temperature;  
 476 TN – thermoneutrality; UCP1 – uncoupling protein 1; IMM – inner mitochondrial membrane.  
 477 Statistical test: Two-tailed Student's t-test (B, E) and one-way ANOVA followed by LSD post-hoc  
 478 test (G, H, J, K). \* p < 0.05.

## 479 **High IF1 levels lead to collapse of MMP upon adrenergic stimulation**

480 To investigate any causal relationship between IF1 and MMP due to changes in ATP  
481 synthase hydrolytic activity, we employed an *in vitro* IF1 loss-of-function model, in which  
482 we silenced *Atp5if1* mRNA levels using small interfering RNA (siRNA) in cultured  
483 differentiated WT1 mouse brown adipocytes. First, we validated our experimental  
484 approach by using oligomycin and FCCP, both drugs capable of modulating MMP, to  
485 verify the accumulation of TMRM within mitochondria in an MMP-dependent manner  
486 (Figure EV2A). Short (i.e., 30 min) pre-treatment with oligomycin increased TMRM  
487 accumulation roughly by 20 % whereas FCCP decreased it by almost 60 %, hence  
488 evidencing expected changes in MMP. Oligomycin effects over MMP were abrogated  
489 once norepinephrine (NE) was added to the media, suggesting the depolarizing effects  
490 of UCP1 outcompete the increase in MMP induced by oligomycin. Of note, NE had no  
491 effects on MMP when FCCP was present. These data suggest that our experimental  
492 approach allows detecting variations in MMP in intact cells.

493 Then, we tested the effects of IF1 silencing on MMP. First, we confirmed the  
494 efficacy of *Atp5if1* siRNA transfection by observing ~80% reduction in *Atp5if1* mRNA  
495 levels (Fig. 2A) as well as lower IF1 protein levels (Fig. 2B) compared to cells transfected  
496 with non-targeting control siRNA (siScrambled). To mimic cold exposure *in vitro*, we  
497 stimulated differentiated adipocytes with NE for 30 min before measuring MMP. As a  
498 control of our NE treatment, we determined p38-MAPK phosphorylation levels and as  
499 expected, NE stimulation increased phosphorylation of p38-MAPK, regardless of IF1  
500 levels (Fig. 2C,D), suggesting that IF1 silencing does not exert a significant influence  
501 over adrenergic signaling. While we observed a mild reduction in MMP upon adrenergic  
502 stimulation, IF1 knockdown did not interfere with this effect (Fig. 2E). These results  
503 demonstrate that loss of IF1 does not affect MMP in NE-stimulated brown adipocytes.  
504 Also, we did not observe modulation of IF1 by NE treatment *in vitro* in either mRNA or  
505 protein level (Figure EV2B,C), confirming that the effect of NE over MMP under the *in*  
506 *vitro* condition is not linked to downregulation of IF1. We also noticed that the ATP  
507 synthase/IF1 ratio is greater in primary differentiated adipocytes compared to BAT  
508 (Figure EV2D), indicating the impact of IF1 modulation is likely not similar between these  
509 two systems, and a direct comparison of these findings warrants caution.

510 Hence, to determine the influence of higher levels of IF1 on MMP upon NE  
511 stimulation of differentiated brown adipocytes, we performed gain-of-function  
512 experiments. Transfection with a vector carrying *Atp5if1* cDNA led to higher IF1 mRNA  
513 (Fig. 2F) and protein (Fig. 2G) levels in differentiated mouse brown adipocytes. We  
514 confirmed higher p38-MAPK phosphorylation levels in NE-stimulated cells compared to  
515 non-stimulated controls (Fig. 2H) and found no apparent impairment in adrenergic  
516 signaling caused by IF1 overexpression (Fig. 2I). However, upon adrenergic stimulation,  
517 cells overexpressing IF1 showed a more pronounced drop in MMP (Fig. 2J). These  
518 results indicate that IF1 overexpression sensitizes the cell to decrease MMP further  
519 compared to control cells when stimulated with NE regardless of the absence of changes  
520 in adrenergic signaling (i.e. p-p38MAPK levels). This is consistent with a possible  
521 inhibition of the capacity of ATP synthase to operate in the reverse mode, resulting in a  
522 lower contribution of ATP synthase to MMP and, consequently, greater depolarization of  
523 mitochondria. As UCP1 activation in brown adipocytes is expected to influence MMP, we  
524 investigated the necessity of UCP1 for this mechanism to take place. For that, we  
525 silenced *Ucp1* mRNA in differentiated brown adipocytes and overexpressed IF1 at the  
526 same time (Fig. 2K). While *Ucp1* knockdown did not cause any major effect on MMP at



527 baseline conditions or upon adrenergic stimulation, the reduction in MMP observed in  
 528 cells overexpressing IF1 was abrogated when *Ucp1* was silenced (Fig. 2L). This shows  
 529 that activation of UCP1 following adrenergic stimulation is a prerequisite for the  
 530 modulatory effects of IF1 on MMP. We next sought to determine whether the effect of IF1  
 531 overexpression was specifically related to its binding to ATP synthase. To test this, we  
 532 overexpressed a mutant IF1 protein harboring an E55A substitution that renders the  
 533 protein unable to interact with the ATP synthase (Figure EV2E). Upon adrenergic  
 534 stimulation, overexpression of IF1, but not E55A IF1, reduced MMP in differentiated  
 535 brown adipocytes (Fig. 2M). Altogether, our data show that high levels of IF1 in brown  
 536 adipocytes result in mitochondria that cannot sustain MMP upon adrenergic stimulation,  
 537 and this mechanism is dependent on UCP1.

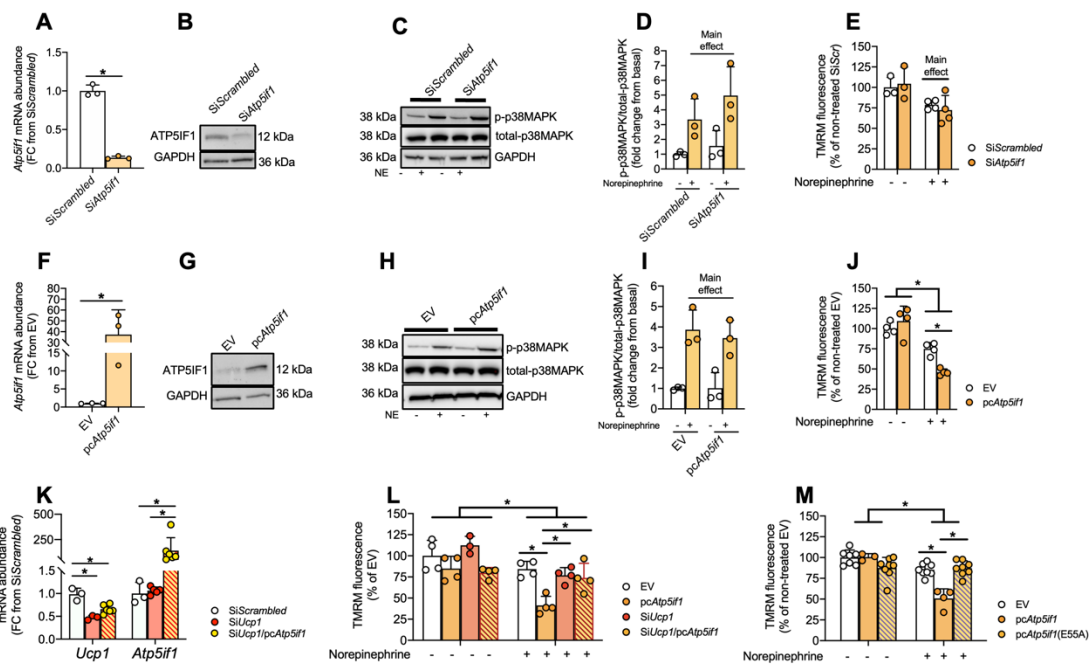

538  
 539 **Figure 2 – IF1 modulates mitochondrial membrane potential upon adrenergic stimulation.**  
 540 (A) *Atp5if1* mRNA and (B) protein levels following *Atp5if1* knockdown in differentiated WT1 brown  
 541 adipocytes. (C) Representative immunoblots and (D) quantification of p-p38-MAPK in non-  
 542 stimulated and norepinephrine (NE)-stimulated (10  $\mu$ M for 30 minutes) WT1 cells in which *Atp5if1*  
 543 was knocked down (si*Atp5if1*) or in scramble controls (siScrambled). (E) Relative TMRM  
 544 fluorescence at baseline and upon NE stimulation in IF1-knocked down adipocytes. (F) *Atp5if1*  
 545 mRNA and (G) protein levels following IF1 overexpression in WT1 brown adipocytes. (H)  
 546 Representative immunoblots and (I) quantification of p-p38-MAPK in non-stimulated and NE-  
 547 stimulated (10  $\mu$ M for 30 minutes) WT1 cells in which IF1 was overexpressed (pc*Atp5if1*) or an  
 548 empty vector control (EV). (J) Relative TMRM fluorescence at the baseline and following NE  
 549 stimulation. (K) *Ucp1* and *Atp5if1* mRNA levels following *Ucp1* knockdown, IF overexpression, or  
 550 both. (L) Relative TMRM fluorescence at baseline and upon NE stimulation in *Ucp1* knocked  
 551 down/IF1 overexpressing WT1 cells. (M) Relative TMRM fluorescence at baseline and following  
 552 NE stimulation in cells overexpressing mutant IF1(E55A). *Atp5if1* – ATP synthase inhibitory factor  
 553 subunit 1; GAPDH – glyceraldehyde-3-phosphate dehydrogenase; TMRM –  
 554 tetramethylrhodamine methyl ester; FC – fold change; FCCP – Carbonyl cyanide-p-  
 555 trifluoromethoxyphenylhydrazine; p38MAPK – p38 mitogen-activated protein kinase; NE –  
 556 norepinephrine; UCP1 – Uncoupling protein 1; EV – empty vector. Statistical test: Two-tailed  
 557 Student’s t-test (A, D, F, I), one-way ANOVA followed by LSD post-hoc test (K, M), and two-way  
 558 ANOVA followed by LSD post-hoc test (E, J, L). \* p < 0.05.

## 559 **IF1 silencing potentiates mitochondrial lipid oxidation in brown adipocytes**

560 Next, we investigated the metabolic implications of IF1 silencing in mouse primary brown  
561 differentiated adipocytes. We confirmed IF1 silencing by observing lower IF1 mRNA  
562 (Fig. 3A) and protein (Fig. 3B) levels in the cells after transfection with *Atp5if1* siRNA.  
563 We determined oxygen consumption of these cells following NE stimulation. At first, we  
564 did not observe any differences in mitochondrial respiration (Fig. 3C,D). It has been  
565 suggested that lipolysis drives mitochondrial uncoupling in a UCP1-independent manner  
566 in non-buffered media(Li et al., 2014), which could represent a caveat in our experiments.  
567 Therefore, we repeated the experiment with the addition of 2 % fatty acid-free BSA to  
568 buffer the excess of lipids caused by NE-induced lipolysis. However, we did not detect  
569 any effect of IF1 knockdown on mitochondrial oxygen consumption at baseline or in  
570 response to adrenergic stimulation (Figure EV3A,B). Of note, in the presence of 2 % fatty  
571 acid-free BSA, we noticed IF1 knockdown in thermogenic adipocytes increased maximal  
572 activity of the electron transport chain (Figure EV3A,B), suggesting an interaction  
573 between the absence of IF1 and lipids controlling respiration independently of ATP  
574 synthase and/or UCP1. Nevertheless, we detected higher acidification rates in IF1-  
575 deficient cells at baseline and after NE stimulation compared to scramble siRNA control  
576 cells (Fig. 3E,F), indirectly suggesting a greater reliance on aerobic glycolysis under  
577 these conditions. These differences were not explained by changes in oxidative  
578 phosphorylation (OxPhos) subunit levels (Fig. 3G) or by differences in total cellular ATP  
579 levels (Fig. 3H). However, the ATP/ADP ratio was lower in IF1 knockdown adipocytes  
580 compared to scramble controls (Fig. 3I), suggesting cells with reduced IF1 levels  
581 experience mild energetic stress. The reduction in the ATP/ADP ratio is one of the most  
582 important inducers of glycolysis (Kemp and Gunasekera, 2002; Schormann et al., 2019),  
583 suggesting that an increase in glycolysis could be a compensatory mechanism to sustain  
584 ATP levels in IF1 silenced cells. To test this, we dissected the contribution of substrates  
585 to ATP synthesis using a reductionistic one-substrate approach. For that, we deprived  
586 cells of any other exogenous substrate and measured respiration and acidification rates  
587 after the injection of glucose to estimate cellular ATP production. We observed that cells,  
588 in which IF1 was silenced, generated more than 75 % of ATP from aerobic glycolysis  
589 and less than 25 % from mitochondrial respiration (Fig. 3J), whereas the source of ATP  
590 in control cells was roughly ~50 % coming from aerobic glycolysis and ~50 % from  
591 mitochondrial respiration. It is important to highlight that the estimation of ATP production  
592 in live cells by measuring O<sub>2</sub> consumption and extracellular acidification rates does not  
593 consider proton generation from other processes (e.g., tricarboxylic acid cycle or NAD(P)  
594 turnover) or UCP1-dependent uncoupling that, despite the absence of stimulation, are  
595 likely there. Therefore, interpretations of this experiment should be done carefully.

596 These results prompted us to investigate whether brown adipocytes with reduced  
597 IF1 levels display altered substrate preference to sustain normal overall respiration. As  
598 the measurement of whole-cell oxygen consumption does not differentiate between the  
599 substrates being used, we hypothesized that the reduced mitochondrial glucose  
600 utilization for oxidative phosphorylation in IF1-deficient cells could be paralleled by  
601 greater mitochondrial lipid oxidation, a process that uses more oxygen to generate ATP  
602 in comparison to carbohydrate oxidation. To test this hypothesis, we performed  
603 mitochondrial respiration analysis in brown adipocytes in the presence of 100 μM  
604 palmitate while in the absence of any other exogenous substrates. Using this  
605 experimental design, we observed that adipocytes, in which IF1 was silenced displayed  
606 higher respiration upon NE stimulation compared to control cells (Fig. 3K,L).

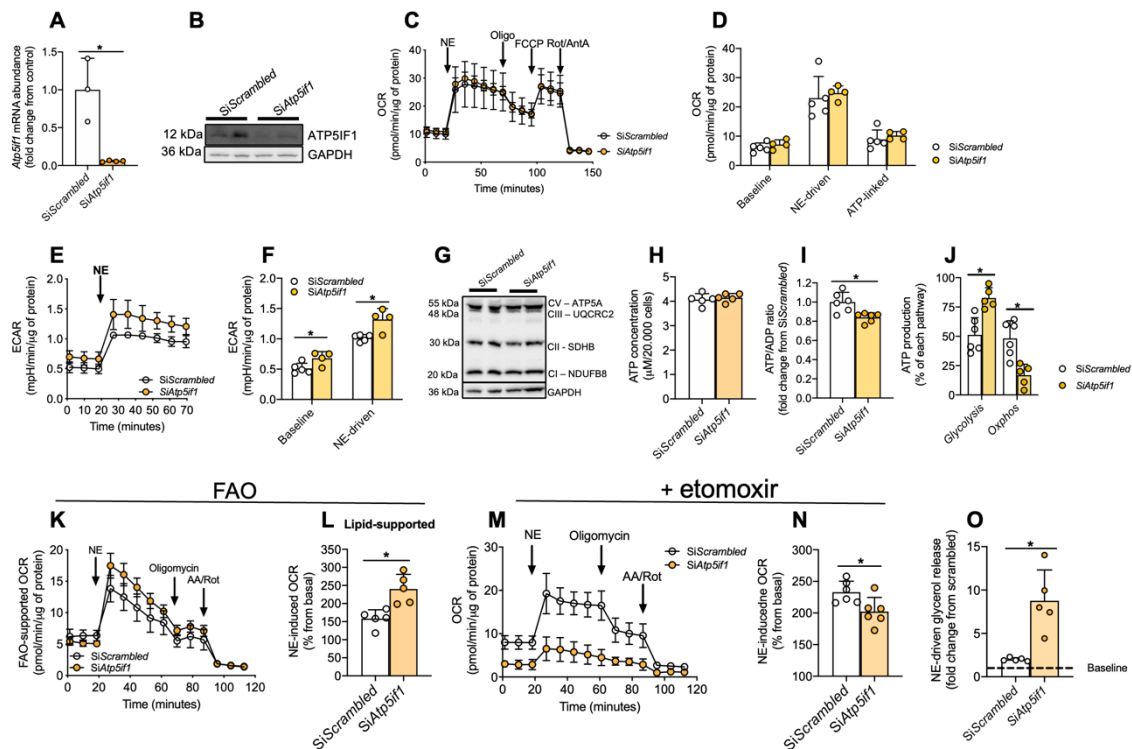

607 **Figure 3 – IF1 knockdown induces mitochondrial lipid oxidation in brown adipocytes.** (A)  
 608 *Atp5f1* mRNA and (B) protein levels. (C) Representative plot and (D) quantification of oxygen  
 609 consumption rate following NE stimulation in primary brown adipocytes upon IF1 knockdown  
 610 (*siAtp5f1*) or scramble control (*siScrambled*). (E) Representative plot and (F) quantification of  
 611 extracellular acidification rate in these cells. (G) Representative immunoblots of OxPhos subunits  
 612 in primary brown adipocytes. (H) Cellular ATP content, (I) ATP/ADP ratio and (J) relative ATP  
 613 production from glucose. (K) Representative plot of fatty-acid oxidation-supported respiration (100  
 614  $\mu$ M palmitate) and (L) quantification of NE-driven oxygen consumption. (M) Representative plot  
 615 and (N) NE-induced respiration in the presence of etomoxir. (O) NE-driven glycerol release.  
 616 *Atp5f1* – ATP synthase inhibitory factor subunit 1; GAPDH – glyceraldehyde-3-phosphate  
 617 dehydrogenase; OCR – oxygen consumption rate; NE – norepinephrine; Oligo – oligomycin;  
 618 FCCP - carbonyl cyanide-p-trifluoromethoxyphenylhydrazone; Rot – rotenone; AA – antimycin A;  
 619 ATP – adenosine triphosphate; ECAR – extracellular acidification rate; OxPhos – oxidative  
 620 phosphorylation; CI – complex I; CII – complex II; CIII – complex III; CV – complex V; FAO – fatty-  
 621 acid oxidation. Two-tailed Student’s t-test (A, D, F, H, I, J, L, N, O). \*  $p < 0.05$ .

622

623

624

625

626

627

628

629

630

631

632

633

634

635

To evaluate the extent to which IF1-deficient brown adipocytes depend on lipids for sustaining respiration, we measured cellular respiration in the presence of glucose, pyruvate, and glutamine as well as etomoxir, an inhibitor of carnitine-palmitoyl transferase 1, the rate-limiting step for lipid utilization by mitochondria. In the presence of etomoxir, mitochondrial respiration as well as NE-driven respiration was roughly 25 % lower in IF1-deficient cells compared to controls (Fig. 3M,N). Of note, the metabolic remodeling observed after IF1 silencing resulted in higher lipolytic capacity (Fig. 3O), as observed by greater glycerol release upon adrenergic stimulation. Despite the increased potential to mobilize lipids through lipolysis, lipid content was similar between IF1-knockdown and control cells (Figure EV3C). Altogether, these data demonstrate that reducing IF1 levels primes mitochondria to utilize more lipids, thus supporting NE-induced uncoupling and mitochondrial oxygen consumption, while a compensatory mechanism seems to increase aerobic glycolysis to sustain cellular ATP levels.

636

637 **IF1 overexpression induces a quiescent-like state in brown adipocytes**

638 As we demonstrated that higher levels of IF1 promote MMP reduction upon NE  
639 stimulation, we transiently overexpressed IF1 in differentiated primary brown adipocytes  
640 to test the impact of such manipulation on mitochondrial bioenergetics in mature cells.  
641 We first confirmed the overexpression of IF1 upon the transfection protocol by measuring  
642 *Atp5if1* mRNA (Fig. 4A) and protein (Fig. 4B) levels. We then measured mitochondrial  
643 respiration following acute NE stimulation. We observed a profound reduction in  
644 mitochondrial respiration as well as complete abrogation of NE-induced uncoupling in  
645 cells overexpressing IF1 compared to control cells transfected with the empty vector  
646 (Fig. 4C,D). Of note, the addition of 2 % fatty acid-free BSA in the media did not abrogate  
647 the inhibitory effects of IF1 overexpression over brown adipocytes' mitochondrial  
648 respiration (Figure EV4A,B). Intriguingly, we did not find any compensatory response in  
649 aerobic glycolysis in IF1-overexpressing cells (Fig. 4E,F). Moreover, we observed an  
650 almost 50 % reduction in fatty acid-supported mitochondrial respiration at baseline and  
651 following NE stimulation in these cells (Fig. 4G,H). Overexpression of IF1 impaired  
652 mitochondrial respiration independently of respiratory complexes content (Fig. 4I). These  
653 data show that IF1 overexpression blunts mitochondrial respiration in primary brown  
654 adipocytes.

655

656 The reduction in mitochondrial respiration without any compensatory change in glycolytic  
657 activity led us to hypothesize that with high levels of IF1, the cells were transitioning into  
658 a quiescence-like state, resulting in overall lower metabolic activity. Thus, we estimated  
659 glucose-dependent ATP production from glycolysis and oxidative phosphorylation. We  
660 observed that total ATP production was almost 50% lower in cells overexpressing IF1  
661 (Fig. 4J), and this was explained by lower oxidative phosphorylation-linked ATP  
662 production. Consequentially, cellular ATP content was approximately 50% lower in IF1  
663 overexpressing cells compared to control cells (Fig. 4K). However, ATP/ADP ratio was  
664 not different between the groups (Fig. 4L), suggesting IF1-overexpressing cells did not  
665 experience energetic stress despite the reduction in mitochondrial OxPhos. Of note, we  
666 did not detect any differences in mRNA or protein yield, or in the lipolytic capacity of the  
667 cells overexpressing IF1 (Figure EV4C-E), suggesting that these cells remained  
668 otherwise healthy. Hence, high levels of IF1 blunt mitochondrial respiration, ATP  
669 production, and NE-induced uncoupling in brown adipocytes.



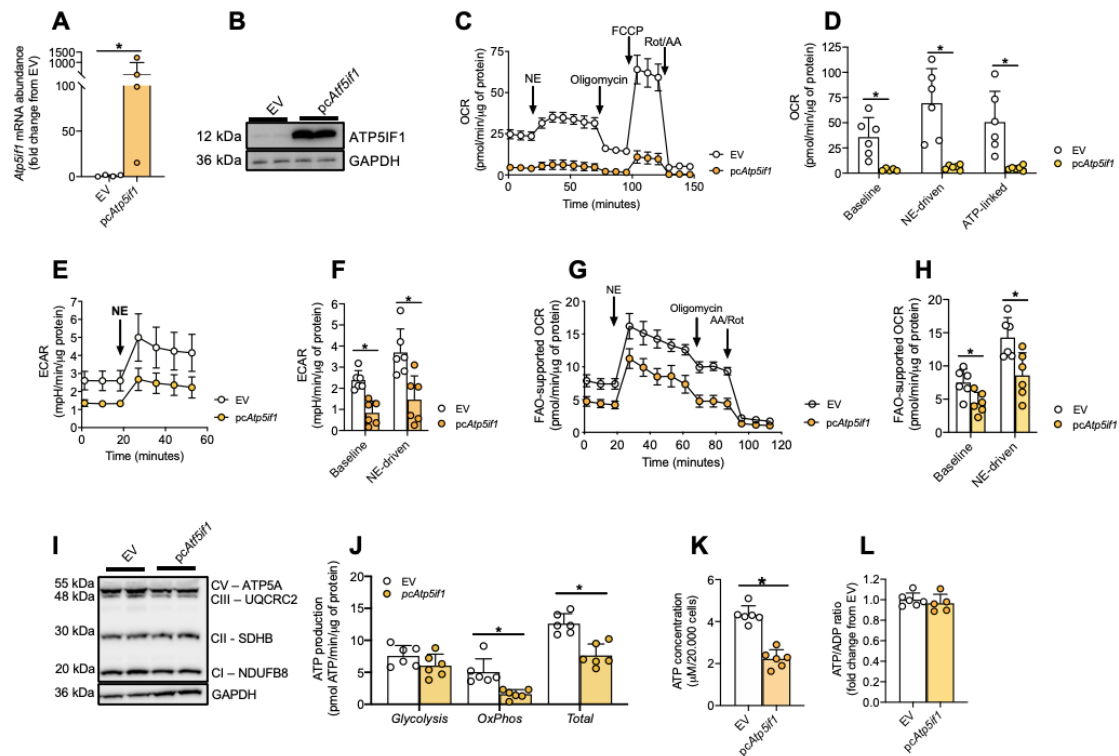

670

671

672 **Figure 4 – IF1 overexpression blunts OxPhos and ATP production in primary brown**

673 **adipocytes.** (A) *Atp5if1* mRNA and (B) protein levels in primary brown differentiated adipocytes

674 following *Atp5if1* overexpression. (C) Representative plot and (D) quantification of oxygen

675 consumption rate following NE stimulation in primary brown adipocytes overexpressing IF1

676 (pcAtp5if1) or an empty vector (EV). (E) Representative plot and (F) quantification of extracellular

677 acidification rate at baseline and upon NE stimulus. (G) Representative plot of fatty-acid oxidation-

678 supported respiration (100  $\mu$ M palmitate) and (H) quantification of baseline and NE-driven oxygen

679 consumption. (I) Representative immunoblots of OxPhos subunits in primary brown adipocytes.

680 (J) Glycolytic, OxPhos, and total ATP production from glucose; (K) total cell ATP content, and (L)

681 ATP/ADP ratio. *Atp5if1* – ATP synthase inhibitory factor subunit 1; GAPDH – glyceraldehyde-3-

682 phosphate dehydrogenase; EV – empty vector; OCR – oxygen consumption rate; NE –

683 norepinephrine; Oligo – oligomycin; FCCP – carbonyl cyanide-p-

684 trifluoromethoxyphenylhydrazine; Rot – rotenone; AA – antimycin A; ATP – adenosine

685 triphosphate; ECAR – extracellular acidification rate; Oxphos – oxidative phosphorylation; CI –

686 complex I; CII – complex II; CIII – complex III; CV – complex V; FAO – fatty-acid oxidation. Two-

687 tailed Student's t-test (A, D, F, H, J, K, L). \*  $p < 0.05$ .

688

689

690 ***In vivo* IF1 overexpression reduces mitochondrial respiration and limits**

691 **adrenergic-induced NST in BAT**

692 Having explored the effects of IF1 gain and loss-of-function *in vitro*, we interrogated the

693 physiological effects of IF1 manipulation *in vivo*. For that, we employed two *in vivo*

694 models of gain or loss-of-function. Given the temperature dependency on IF1 levels in

695 BAT, we tested the effects of constitutive global IF1 global knockout (IF1-KO) in

696 thermoneutrality and BAT-restricted AAV-mediated IF1 overexpression below

697 thermoneutrality, when thermogenesis is stimulated. Compared to control mice, whole-

698 body IF1-KO male mice did not show changes in body weight, food intake, baseline, or

699 CL316,243-induced oxygen consumption adapted to room temperature or

thermoneutrality (Fig. EV5A-H). These results mirrored our results obtained in cultured

700 adipocytes, in which IF1 knockdown in brown adipocytes did not change mitochondrial  
701 uncoupling or overall oxygen consumption in response to adrenergic stimulation when  
702 all substrates were present. Next, to test the complementary scenario of overexpressing  
703 IF1 when it is naturally down-regulated by cold, we injected adeno-associated virus-  
704 carrying IF1 (AAV-Atp5if1) or a GFP-carrying vector (AAV-GFP) into BAT of adult mice  
705 housed at room temperature and exposed them to cold (4 °C) for 5 days (Fig. 5A). We  
706 confirmed our transduction protocol by observing roughly ~40-fold higher mRNA levels  
707 and ~2-fold higher protein levels of IF1 in the interscapular BAT depot (iBAT),  
708 respectively (Fig. 5B-D) while no changes in body weight or food intake were observed  
709 (Fig. EV6A,B).

710  
711 Given that overexpression of IF1 *in vitro* led to a marked reduction in cellular respiration,  
712 we next tested the effects of IF1 overexpression on mitochondrial oxygen consumption  
713 in saponin-permeabilized BAT *ex vivo*. We found that regardless of the substrate offered,  
714 oxygen consumption was lower in BAT from AAV-Atp5if1 mice compared to AAV-GFP  
715 controls (Fig. 5E). Next, we added GDP, an inhibitor of UCP1, to estimate the  
716 contribution of UCP1-dependent respiration in our assay. Interestingly, we found a ca.  
717 40 % reduction in mitochondrial respiration in BAT from AAV-GFP mice while the effect  
718 of GDP in mitochondria from IF1 overexpressing mice was ca. 70 % lower (Fig. 5F,G).  
719 Together, these data indicate hampered uncoupled respiration in BAT of AAV- Atp5if1  
720 mice. Once UCP1 activity is inhibited, we added ADP into the chamber to stimulate  
721 respiration in a complex V-dependent manner (i.e., OxPhos). By doing that, while in BAT  
722 from AAV-GFP mice ADP increased respiration by ~10 pmol/seg/mg of tissue, the  
723 capacity of ADP to drive respiration was completely suppressed in BAT derived from  
724 AAV- Atp5if1 mice (Fig. 5H,I). Of note, we did not find differences in OxPhos subunit  
725 contents (Fig. 5J,K) following IF1 overexpression in iBAT. In agreement with ADP-driven  
726 respiration, ATP hydrolytic activity in iBAT homogenates was lower in AAV- Atp5if1-  
727 injected compared to AAV-GFP-injected mice (Fig. 5L,M). Altogether, overexpression of  
728 IF1 in iBAT of adult mice resulted in lower respiratory capacity, lower uncoupled  
729 respiration, and lower ATP synthase hydrolytic activity.

730  
731 While mice overexpressing IF1 in iBAT showed a slight increase in whole-body oxygen  
732 consumption during the light phase that was not explained by greater voluntary physical  
733 activity (Figure EV6C,D), correlation analysis did not show any significant differences in  
734 overall energy expenditure when plotted against body weight between AAV-GFP and  
735 AAV-Atp5if1 mice (Fig. 5N). Although iBAT temperature was slightly higher in AAV-  
736 Atp5if1 mice compared to AAV-GFP at RT (Figure EV6E), both groups showed similar  
737 iBAT temperature, body weight, and food intake variation during the 5 days of cold  
738 exposure (Figure EV6E-G), suggesting IF1 overexpression in iBAT does not interfere  
739 with cold adaptation of mice (Figure EV6E,F). Given the involvement of several  
740 complementary mechanisms to support NST, to specifically investigate the role of IF1 in  
741 iBAT, we assessed whole-body oxygen consumption and iBAT temperature in mice  
742 injected with CL316,243 (Collins, 2022). Interestingly, we found *in vivo* mitochondrial  
743 uncoupling induced by acute CL-316,243 injection was diminished in animals  
744 overexpressing IF1 in iBAT (Fig. 5O,P). Similarly, we noticed the increase of iBAT  
745 temperature after CL316,243 injection was lower in AAV-Atp5if1 injected mice compared  
746 to AAV-GFP controls (Fig. 5Q,R). Altogether, our data indicate overexpression of IF1  
747 suppresses mitochondrial respiration, ATP synthase function, and interferes with the  
748 thermogenic response of iBAT.

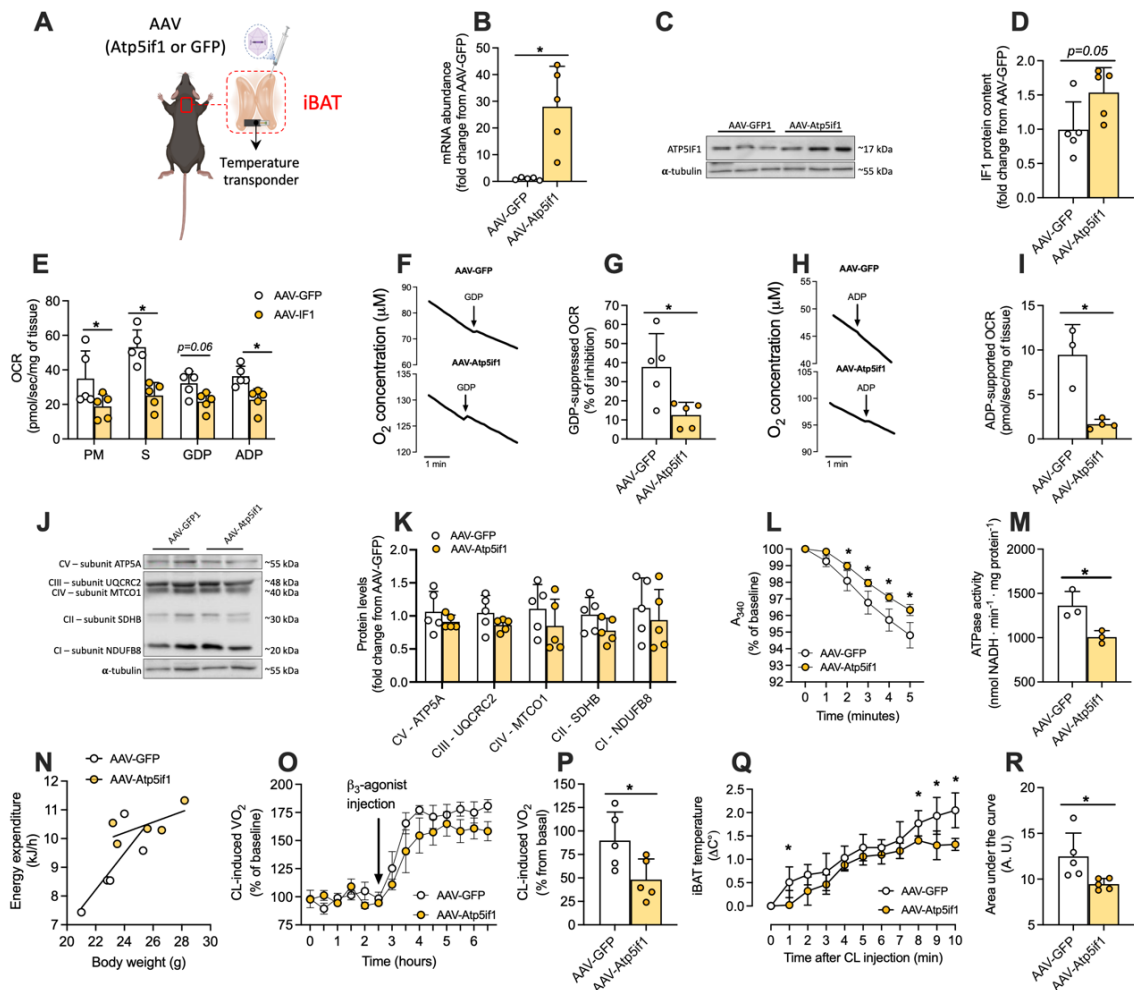

749

750

**Figure 5 – *In vivo* IF1 overexpression in iBAT suppresses adrenergic-induced thermogenic**

751

**and mitochondrial respiration.** (A) Model for AAV-induced IF1 overexpression in

752

iBAT of male mice (created with BioRender). (B) IF1 mRNA levels in iBAT; (C) representative

753

immunoblot and (D) quantification of IF1 in iBAT. (E) Mitochondrial oxygen consumption in the

754

presence of pyruvate/malate (complex I), succinate (complex II), GDP (UCP1 inhibitor), and ADP

755

(OxPhos stimulator). (F) Representative  $O_2$  consumption changes induced by GDP and (G)

756

quantification of % of inhibition caused by GDP. (H) Representative mitochondrial respiration

757

stimulated by ADP and (I) quantification of ADP-supported respiration in the presence of

758

substrates and GDP. (J) Representative and (K) quantification of immunoblot for mitochondrial

759

complexes subunits. (L) Representative trace and (M) quantification of ATP hydrolytic activity of

760

ATP synthase of iBAT overexpressing IF1. (N) Correlation between body weight and energy

761

expenditure (kJ/h) at 22°C. (O) Real-time recording of *in vivo* CL-316,24-induced oxygen

762

consumption and (P) average of 3 h following injection. (Q) Variation of iBAT temperature over

763

10 minutes and (R) area under the curve of CL-316,243-induced iBAT temperature. iBAT –

764

interscapular brown adipose tissue; IF1 – Inhibitor Factor 1; CL – CL-316,243. P – pyruvate; M –

765

malate; S – succinate; GDP – guanosine diphosphate; ADP – adenosine diphosphate; OCR –

766

oxygen consumption rate;  $A_{340}$  – absorbance at 340 nm. Statistical test: Two-tailed Student's t-

767

test. \*  $p < 0.05$ .

768

769

770

771

772

## 773 Discussion

774 Mitochondria in thermogenic adipocytes experience large fluctuations in metabolic rate  
775 depending on the ambient temperature. Considering the high activity of UCP1, sustaining  
776 MMP is an important aspect of NST but it is unclear how cells achieve that. Here we  
777 show that IF1, an inhibitor of mitochondrial ATP synthase, is downregulated in cold-  
778 adapted BAT, allowing greater ATP synthase hydrolytic activity by operating in the  
779 reverse mode. *In vitro*, we found that IF1 overexpression in brown adipocytes makes  
780 mitochondria unable to sustain the MMP upon adrenergic stimulation and blunts  
781 mitochondrial respiration while IF1 knockdown phenocopies features of the metabolic  
782 adaptation of BAT to cold. Finally, *in vivo* IF1 overexpression in iBAT of mice lowers  
783 mitochondrial respiration and suppresses the adrenergic response. Hence, a reduction  
784 of IF1 levels in BAT during cold exposure is a mechanism allowing proper bioenergetic  
785 adaptation during NST.

786  
787 Yamada et al. showed that in BAT from cold-adapted rats, the ATP synthesis capacity  
788 of mitochondria is preserved, whereas ATP hydrolysis is increased by almost 6-fold  
789 (Yamada et al., 1992). At the time, the authors proposed the existence of an unknown  
790 mechanism capable of controlling the counterclockwise rotation (hydrolysis) of ATP  
791 synthase without affecting its clockwise activity (synthesis). Our results shed light onto  
792 the mechanism by which BAT mitochondria adapt to the metabolic challenge imposed  
793 by cold exposure. Agreeing with the prediction by Yamada et al. and providing a  
794 mechanistic underpinning for the phenomenon, our data reveal that IF1 is downregulated  
795 in BAT following cold exposure, thus facilitating the hydrolytic activity of ATP synthase  
796 and, possibly, helping sustain MMP. Although UCP1 activation lowers MMP, its impact  
797 on mitochondrial matrix pH is less clear, therefore, our findings offer an additional  
798 mechanism for controlling ATP synthase hydrolytic activity (i.e., IF1 levels) other than  
799 the well-documented pH-dependent regulation of IF1 (Cabezon et al., 2000). The  
800 suppressive effects of IF1 on MMP are blunted once a mutated IF1(E55A), incapable of  
801 binding to ATP synthase, is used, further demonstrating the effects of IF1 through the  
802 binding of IF1 to ATP synthase. Of note, the lack of phenotype in brown adipocytes when  
803 *Ucp1* was silenced could be explained by residual *Ucp1* gene expression or by the  
804 stimulation of ATP-consuming processes (e.g.,  $Ca^{2+}$  cycling, membrane transport) that  
805 lower MMP in a UCP1-independent manner. Nevertheless, the mechanism by which IF1  
806 modulates MMP in brown adipocytes seems to be dependent on UCP1 activation.  
807 Therefore, it is plausible to speculate that the reduction of MMP upon adrenergic  
808 stimulation in IF1 overexpressing brown adipocytes could be a result of an inability of the  
809 ATP synthase to pump protons back into the intermembrane space due to inhibition of  
810 its hydrolytic activity. If this was true, mitochondria would consume ATP to support MMP  
811 due to the reverse mode of ATP synthase. Although mitochondrial ATP consumption has  
812 been shown in other contexts (Nelson et al., 2021), the contribution of cytosolic ATP to  
813 support ATP synthase has been questioned (Chinopoulos et al., 2010), whereas it  
814 appears matrix substrate-level phosphorylation is able to provide ATP to support ATP  
815 synthase in the reverse mode (Chinopoulos et al., 2010). An alternative hypothesis is  
816 that IF1 overexpression would elicit defects in electron transport chain activity that could  
817 not match the activity of UCP1 upon adrenergic stimulation, which would lead to the  
818 collapse of MMP when UCP1 is activated. This speculation is supported by lower  
819 mitochondrial respiration in the presence of FCCP or substrates feeding complex I and  
820 complex II once IF1 is overexpressed *in vitro* and *in vivo*, respectively. Of note, IF1 has



821 been also reported to modulate mitochondrial cristae shape in intestinal cells  
822 (Domínguez-Zorita et al., 2023), potentially affecting electron transport chain activity.  
823 Nevertheless, the role of IF1 in mitochondrial bioenergetics and metabolism appears to  
824 be more complex than previously anticipated.

825

826 Activation of BAT is associated with an increase in energy expenditure in the tissue as  
827 well as on the whole-body level. At the tissue level, BAT activation increases both lipid  
828 and glucose uptake (Bartelt et al., 2011; Hankir and Klingenspor, 2018; Sponton et al.,  
829 2022). Although the full comprehension of substrates that support short and long-term  
830 NST in BAT is not fully understood (Park et al., 2023),  $\beta_3$ -adrenergic agonist activation  
831 leads to a marked reduction in respiratory exchange ratio (Politis-Barber et al., 2022),  
832 suggesting an overall increase in lipid oxidation. Interestingly, IF1 downregulation is  
833 sufficient to drive cultured brown adipocytes towards lipid utilization despite no changes  
834 in adrenergic signaling or lipid accumulation. Given that  $\beta$ -oxidation produces a higher  
835  $FADH_2/NADH$  ratio compared to glucose oxidation, fatty acid oxidation has a more  
836 pronounced effect on the increase in oxygen consumption ( $FAD$ -supported P/O ratio =  
837 1.5;  $NAD$ -supported P/O ratio = 2.5) than glucose. In support of greater mitochondrial  
838 lipid utilization, we observed the estimated contribution of glycolysis to ATP production  
839 was increased in cells lacking IF1, facilitated by a lower ATP/ADP ratio. Nevertheless, it  
840 could be speculated that brown adipocytes in which IF1 is downregulated rely more on  
841 glycolysis as an ATP source while lipids feed tricarboxylic acid cycle to support  
842 uncoupled mitochondrial respiration, however, how downregulation of IF1 potentiates  
843 lipid utilization remains to be determined.

844

845 The response of BAT to adrenergic stimuli is lower when IF1 is overexpressed in BAT of  
846 mice, suggesting downregulation of IF1 is necessary to promote BAT respiratory  
847 capacity and support the metabolic demand imposed by adrenergic signaling. Indeed,  
848 IF1 overexpression *in vitro* and *in vivo* markedly suppresses mitochondrial respiration.  
849 Considering the unchanged levels of OxPhos complexes in both models, we exclude the  
850 possibility that low respiration could be a result of diminished mitochondrial content. *In*  
851 *vitro*, IF1 overexpression does not appear to induce an overall mitochondrial dysfunction,  
852 but rather pushes the cells into a quiescent-like state. This hypothesis is supported by  
853 the absence of metabolic compensatory mechanisms commonly found in models of  
854 mitochondrial dysfunction, such as increases in glycolysis, glycolysis-supported ATP  
855 production, or ATP/ADP ratio (Zhou et al., 2022; Formentini et al., 2012). It is noteworthy  
856 that upon cold adaptation, BAT undergoes remodeling by cell proliferation, inhibition of  
857 apoptosis, higher protein and lipid synthesis, and overall tissue expansion (Nedergaard  
858 et al., 2019). It has been shown that IF1 manipulation profoundly affects cellular  
859 metabolism and adaptation to stress in other contexts (e.g., cancer cells, skeletal muscle,  
860 cardiomyocytes) (Zhou et al., 2022; Formentini et al., 2012; Sa and Formentini, 2012),  
861 suggesting that higher levels of IF1 in BAT help brown fat cells remain in a quiescent-  
862 like state when NST is unnecessary. Interestingly, we observed that the effects of IF1  
863 overexpression in BAT were compensated and masked by other thermogenic  
864 mechanisms. For instance, inguinal WAT weight and *Ucp1* mRNA levels were greater in  
865 mice overexpressing IF1 in iBAT compared to AAV-GFP mice (Figure EV6H, I) following  
866 5 days of cold exposure, indicating greater recruitment of beige adipocytes in this remote  
867 fat depot when IF1 is overexpressed in iBAT.

868

869 It remains unclear how IF1 is downregulated following cold exposure. Notably, 4 hours  
870 of cold exposure or CL administration in mice decrease *Atp5if1* mRNA levels in BAT by  
871 almost 50 %, suggesting that the downregulation of IF1 may be controlled acutely at the  
872 transcriptional level. It has also been shown that immediate early response 1 (IEX1)  
873 targets IF1 for degradation (Shen et al., 2009). While IEX1 KO mice are protected from  
874 high-fat diet-induced insulin resistance through browning of adipose tissue, as far as we  
875 know, the response of IEX1 to cold exposure in BAT is unknown (Shahid et al., 2016).  
876 Therefore, proteolytic control of IF1 following cold exposure cannot be ruled out yet. Of  
877 note, one proteomic study found an increase of IF1 content following short-term cold  
878 exposure in mice (Forner et al., 2009); therefore, future studies should seek to conciliate  
879 such differences to better understand how IF1 is regulated under different metabolic  
880 contexts. Furthermore, exploring the non-canonical roles of IF1, including its rapid  
881 regulation by soluble PKA (García-Bermúdez et al., 2015), may reveal additional roles  
882 of IF1 in NST without modulation of its content. Finally, the involvement of IF1 in cell  
883 proliferation, apoptosis, and differentiation (Formentini et al., 2012; Esparza-Moltó et al.,  
884 2017), alongside its impact on mitochondrial morphology (Domínguez-Zorita et al.,  
885 2023), is warranted, as the downregulation of IF1 with prolonged cold exposure may  
886 indicate broader alterations linked to adipose tissue remodeling. In addition, our analyses  
887 were performed in the whole homogenate or intact cells, therefore, ignoring possible  
888 subcellular changes in IF1 localization. Given that two different populations of  
889 mitochondria have been reported in thermogenic adipocytes (Benador et al., 2018), it  
890 would be interesting in the future to address IF1 modulation in these distinct populations  
891 to further expand our knowledge on the role of IF1 in mitochondrial bioenergetics.

892

893 In summary, the decline in IF1 levels observed in BAT during cold exposure serves as  
894 an adaptive mechanism, facilitating the remodeling of mitochondrial and cellular  
895 metabolism to support NST. We propose that this mechanism enables brown adipocytes  
896 to maintain MMP when UCP1 and NST are chronically activated. As a result, modulation  
897 of ATP synthase activity by IF1 downregulation is an additional mechanism to support  
898 BAT adaptation to NST.

899

## Acknowledgments

We thank Dr. Elzira Saviani, Silvia Weidner, and Thomas Pitsch for their excellent technical assistance. H.S.B., S. C. C. Z., F. V., V. F., R. F. C., and M.A.M. were supported by the Fundação de Amparo à Pesquisa do Estado de São Paulo – FAPESP (2019/21852-1, 2022/00358-1, 2023/07882-0, 2021/08354-2, 2013/07607-8, 2017/17728-8, 2023/00229-0, 2022/13145-6, 2020/14725-0). M.A.M. was funded by the Conselho Nacional de Desenvolvimento Científico e Tecnológico (CNPq) (310287/2018-9 and 306193/2022-1) and Coordenação de Aperfeiçoamento de Pessoal de Nível Superior – Brasil (CAPES) (88881.143924/2017-01). A.B. was supported by the Deutsche Forschungsgemeinschaft (SFB1123-B10 & SPP2306 BA4925/2-1), the Deutsches Zentrum für Herz-Kreislauf-Forschung DZHK, and the ERC Starting Grant PROTEOFIT. The graphical abstract and cartoons in Figures 1 and 5 were created using BioRender.com.

## Competing interest

The authors declare no competing financial interests related to this work.

## Author contributions

H.S.B. designed and performed experiments, analyzed data, and wrote the manuscript. A.S.J., F. V., S. C. C., J. G., V. F., A.F., and M. B. designed and performed experiments. R. F. C., S. K., M. J., P. M. M. M. V., L. M., C. H. S., and M.A.M. designed experiments, analyzed data, and edited the manuscript. A.B. designed experiments, analyzed data, and wrote the manuscript. All authors read and commented on the manuscript.

## References

- Acin-perez, R. *et al.* (2023) Inhibition of ATP synthase reverse activity restores energy homeostasis in mitochondrial pathologies. *EMBO Journal*, pp. 1–21. Available at: <https://doi.org/10.15252/embj.2022111699>.
- Bartelt, A. *et al.* (2011) Brown adipose tissue activity controls triglyceride clearance. *Nature Medicine*, 17(2), pp. 200–206. Available at: <https://doi.org/10.1038/nm.2297>.
- Benador, I.Y. *et al.* (2018) Mitochondria Bound to Lipid Droplets Have Unique Bioenergetics, Composition, and Dynamics that Support Lipid Droplet Expansion. *Cell Metabolism*, 27(4), pp. 869-885.e6. Available at: <https://doi.org/10.1016/j.cmet.2018.03.003>.
- Brunetta, H. S. *et al.* (2020) Nitrate attenuates HFD-induced glucose intolerance in association with reduced epididymal adipose tissue inflammation and mitochondrial ROS emission. *The Journal of Physiology*. Available at: <https://doi.org/10.1113/JP279455>.
- Brunetta, H.S. *et al.* (2022) Nitrate consumption preserves HFD-induced skeletal muscle mitochondrial ADP sensitivity and lysine acetylation: A potential role for SIRT1. *Redox Biology*, 52(3). Available at: <https://doi.org/10.1016/j.redox.2022.102307>.
- Cabezón, E. *et al.* (2000) Modulation of the oligomerization state of the bovine F1-ATPase inhibitor protein, IF1, by pH. *Journal of Biological Chemistry*, 275(33), pp. 25460–25464. Available at: <https://doi.org/10.1074/jbc.M003859200>.

- Cabezón, E. *et al.* (2003) The structure of bovine F<sub>1</sub>-ATPase in complex with its regulatory protein IF<sub>1</sub>. *Nature Structure Biology*, 10(9), pp. 744–750. Available at: <https://doi.org/10.1038/nsb966>.
- Cannon, B. and Nedergaard, J. (2004) Brown Adipose Tissue: Function and Physiological Significance. *Physiological Reviews*, 84(1), pp. 277–359. Available at: <https://doi.org/10.1152/physrev.00015.2003>.
- Chen, W.W. *et al.* (2014) Report Inhibition of ATPIF1 Ameliorates Severe Mitochondrial Respiratory Chain Dysfunction in Mammalian Cells. *Cell Reports*, pp. 27–34. Available at: <https://doi.org/10.1016/j.celrep.2014.02.046>.
- Chinopoulos, C. *et al.* (2010) Forward operation of adenine nucleotide translocase during F<sub>0</sub>F<sub>1</sub>-ATPase reversal: critical role of matrix substrate-level phosphorylation. *The FASEB Journal*, 24(7), pp. 2405–2416. Available at: <https://doi.org/10.1096/fj.09-149898>.
- Chouchani, E.T., Kazak, L. and Spiegelman, B.M. (2019) New Advances in Adaptive Thermogenesis: UCP1 and Beyond. *Cell Metabolism*, 29(1), pp. 27–37. Available at: <https://doi.org/10.1016/j.cmet.2018.11.002>.
- Collins, S. (2022)  $\beta$ -Adrenergic Receptors and Adipose Tissue Metabolism: Evolution of an Old Story. *Annual Review of Physiology*, Available at: <https://doi.org/10.1146/annurev-physiol-060721>.
- Domínguez-Zorita, S. *et al.* (2023) IF<sub>1</sub> ablation prevents ATP synthase oligomerization, enhances mitochondrial ATP turnover and promotes an adenosine-mediated pro-inflammatory phenotype. *Cell Death and Disease*, 14(7). Available at: <https://doi.org/10.1038/s41419-023-05957-z>.
- Esparza, P.B. *et al.* (2017) Regulation of the H<sup>+</sup>-ATP synthase by IF<sub>1</sub>: a role in mitohormesis. *Cell Molecular Life Sciences*, 74, pp. 2151–2166. Available at: <https://doi.org/10.1007/s00018-017-2462-8>.
- Fedorenko, A., Lishko, P. and Kirichok, Y. (2012) Mechanism of fatty-acid-dependent UCP1 uncoupling in brown fat mitochondria. *Cell*, 151(1), pp. 400–413. Available at: <https://doi.org/10.1016/j.cell.2012.09.010>.Mechanism.
- Formentini, L. *et al.* (2012) The Mitochondrial ATPase Inhibitory Factor 1 Triggers a ROS-Mediated Retrograde Prosurvival and Proliferative Response. *Molecular Cell*, 45(6), pp. 731–742. Available at: <https://doi.org/10.1016/j.molcel.2012.01.008>.
- Formentini, L. *et al.* (2017) Mitochondrial H<sup>+</sup>-ATP synthase in human skeletal muscle: contribution to dyslipidaemia and insulin resistance. *Diabetologia*, 60(10), pp. 2052–2065. Available at: <https://doi.org/10.1007/s00125-017-4379-z>.
- Forner, F. *et al.* (2009) Proteome Differences between Brown and White Fat Mitochondria Reveal Specialized Metabolic Functions. *Cell Metabolism*, 10(4), pp. 324–335. Available at: <https://doi.org/10.1016/j.cmet.2009.08.014>.
- Francisco, A. *et al.* (2018) Nicotinamide nucleotide transhydrogenase is required for brain mitochondrial redox balance under hampered energy substrate metabolism and high-fat diet. *Journal of Neurochemistry*, 147(5), pp. 663–677. Available at: <https://doi.org/10.1111/jnc.14602>.
- Fromme, T. *et al.* (2018) Degradation of brown adipocyte purine nucleotides regulates uncoupling protein 1 activity. *Molecular Metabolism*, 8(12), pp. 77–85. Available at: <https://doi.org/10.1016/j.molmet.2017.12.010>.
- García-Bermúdez, J. *et al.* (2015) PKA Phosphorylates the ATPase Inhibitory Factor 1 and Inactivates Its Capacity to Bind and Inhibit the Mitochondrial H<sup>+</sup>-ATP Synthase. *Cell Reports*, 12(12), pp. 2143–2155. Available at: <https://doi.org/10.1016/j.celrep.2015.08.052>.



- Giroud, M. *et al.* (2022) Adipocyte function and the development of cardiometabolic disease. *J Physiol*, 600, pp. 1189–1208. Available at: <https://doi.org/10.1113/JP281979#support-information-section>.
- Gledhill, J.R. *et al.* (2007) How the regulatory protein, IF1, inhibits F1-ATPase from bovine mitochondria. *Proceedings of the National Academy of Sciences of the United States of America*, 104(40), pp. 15671–15676. Available at: <https://doi.org/10.1073/pnas.0707326104>.
- Hankir, M.K. and Klingenspor, M. (2018) Brown adipocyte glucose metabolism: a heated subject. *EMBO reports*, 19(9), pp. 1–13. Available at: <https://doi.org/10.15252/embr.201846404>.
- Kemp, R.G. and Gunasekera, D. (2002) Evolution of the allosteric ligand sites of mammalian phosphofructo-1-kinase. *Biochemistry*, 41(30), pp. 9426–9430. Available at: <https://doi.org/10.1021/bi020110d>.
- Kobayashi, R. *et al.* (2023) Molecular mechanism on forcible ejection of ATPase inhibitory factor 1 from mitochondrial ATP synthase. *Nature Communications*, 14(1), p. 1682. Available at: <https://doi.org/10.1038/s41467-023-37182-9>.
- Kotschi, S. *et al.* (2022) NFE2L1-mediated proteasome function protects from ferroptosis. *Molecular Metabolism*, 57. Available at: <https://doi.org/10.1016/j.molmet.2022.101436>.
- Li, Y. *et al.* (2014) Taking control over intracellular fatty acid levels is essential for the analysis of thermogenic function in cultured primary brown and brite/beige adipocytes. *EMBO reports*, 15(10), pp. 1069–1076. Available at: <https://doi.org/10.15252/embr.201438775>.
- Matthias, A. *et al.* (1999) The bioenergetics of brown fat mitochondria from UCP1-ablated mice. UCP1 is not involved in fatty acid-induced de-energization ('uncoupling'). *Journal of Biological Chemistry*, 274(40), pp. 28150–28160. Available at: <https://doi.org/10.1074/jbc.274.40.28150>.
- Mitchell, P. (1961) Coupling of phosphorylation to electron and hydrogen transfer by a chemi-osmotic type of mechanism. *Nature*, 191, pp. 144–148.
- Mookerjee, S.A. *et al.* (2017) Quantifying intracellular rates of glycolytic and oxidative ATP production and consumption using extracellular flux measurements. *Journal of Biological Chemistry*, 292(17), pp. 7189–7207. Available at: <https://doi.org/10.1074/jbc.M116.774471>.
- Nedergaard, J., Wang, Y. and Cannon, B. (2019) Cell proliferation and apoptosis inhibition: essential processes for recruitment of the full thermogenic capacity of brown adipose tissue. *Biochimica et Biophysica Acta - Molecular and Cell Biology of Lipids*, 1864(1), pp. 51–58. Available at: <https://doi.org/10.1016/j.bbalip.2018.06.013>.
- Nelson, M.A.M. *et al.* (2021) Intrinsic OXPHOS limitations underlie cellular bioenergetics in leukemia. *eLife*, pp. 1–31.
- Nicholls, D.G. (2021) Mitochondrial proton leaks and uncoupling proteins. *Biochimica et Biophysica Acta - Bioenergetics*, 1862(7), p. 148428. Available at: <https://doi.org/10.1016/j.bbabi.2021.148428>.
- Nicholls, D.G. (2023) Fifty years on: How we uncovered the unique bioenergetics of brown adipose tissue. *Acta Physiologica*, 237(4).
- Park, G. *et al.* (2023) Quantitative analysis of metabolic fluxes in brown fat and skeletal muscle during thermogenesis. *Nature Metabolism*, 5(7), pp. 1204–1220. Available at: <https://doi.org/10.1038/s42255-023-00825-8>.

Petrack, H.L. *et al.* (2020) *In vitro* ketone-supported mitochondrial respiration is minimal when other substrates are readily available in cardiac and skeletal muscle. *Journal of Physiology*, 598(21), pp. 4869–4885. Available at: <https://doi.org/10.1113/JP280032>.

Petrack, H.L. *et al.* (2022) Dietary nitrate increases submaximal SERCA activity and ADP transfer to mitochondria in slow-twitch muscle of female mice. *American Journal of Physiology - Endocrinology and Metabolism*, 323(2), pp. E171–E184. Available at: <https://doi.org/10.1152/ajpendo.00371.2021>.

Politis-Barber, V. *et al.* (2022) Ckmt1 is Dispensable for Mitochondrial Bioenergetics Within White/Beige Adipose Tissue. *Function*, 3(5), pp. 1–16. Available at: <https://doi.org/10.1093/function/zqac037>.

Pullman, M.E. and Monroy, G.C. (1963) A Naturally Occurring Inhibitor of Mitochondrial Adenosine. *The Journal of Biological Chemistry*, 238(11), pp. 3762–3769. Available at: [https://doi.org/10.1016/S0021-9258\(19\)75338-1](https://doi.org/10.1016/S0021-9258(19)75338-1).

Ruas, J.S. *et al.* (2018) High glycolytic activity of tumor cells leads to underestimation of electron transport system capacity when mitochondrial ATP synthase is inhibited. *Scientific Reports*, 8(1), pp. 1–17. Available at: <https://doi.org/10.1038/s41598-018-35679-8>.

Sa, L. and Formentini, L. (2012) The Mitochondrial ATPase Inhibitory Factor 1 Triggers a ROS-Mediated Retrograde Prosurvival and Proliferative Response. *Molecular Cell*, 1(45), pp. 731–742. Available at: <https://doi.org/10.1016/j.molcel.2012.01.008>.

Sánchez-González, C. *et al.* (2020) Dysfunctional oxidative phosphorylation shunts branched-chain amino acid catabolism onto lipogenesis in skeletal muscle. *The EMBO Journal*, 39(14). Available at: <https://doi.org/10.15252/embj.2019103812>.

Schormann, N. *et al.* (2019) An overview of structure, function, and regulation of pyruvate kinases. *Protein Science*, 28(10), pp. 1771–1784. Available at: <https://doi.org/10.1002/pro.3691>.

Shahid, M. *et al.* (2016) IEX-1 deficiency induces browning of white adipose tissue and resists diet-induced obesity. *Scientific Reports*, (March), pp. 1–14. Available at: <https://doi.org/10.1038/srep24135>.

Shen, L. *et al.* (2009) IEX-1 targets mitochondrial F<sub>1</sub>F<sub>o</sub>-ATPase inhibitor for degradation. *Cell Death and Differentiation*, 16(4), pp. 603–612. Available at: <https://doi.org/10.1038/cdd.2008.184>.

Sponton, C.H., de Lima-Junior, J.C. and Leiria, L.O. (2022) What puts the heat on thermogenic fat: metabolism of fuel substrates. *Trends in Endocrinology and Metabolism*, 33(8), pp. 587–599. Available at: <https://doi.org/10.1016/j.tem.2022.05.003>.

Valdivieso-Rivera, F.B., Furino, V. de O. and Sponton, C.H. (2023) Investigation of Beige Fat Biology and Metabolism Using the CRISPR SunTag-p65-HSF1 Activation System. *Journal of Visualized Experiments*, 2023(191). Available at: <https://doi.org/10.3791/64849>.

Willemsen, N. *et al.* (2022) Proteasome dysfunction disrupts adipogenesis and induces inflammation via ATF3. *Molecular Metabolism*, 62(5), p. 101518. Available at: <https://doi.org/10.1016/j.molmet.2022.101518>.

Yamada, E.W. *et al.* (1992) ATPase-inhibitor proteins of brown-adipose-tissue mitochondria from warm- and cold-acclimated rats. *Biochemical Journal*, 287, pp. 151–157.

Zhou, B. *et al.* (2022) Upregulation of mitochondrial ATPase inhibitory factor 1 (ATPIF1) mediates increased glycolysis in mouse Hearts. *Journal of Clinical Investigation*, 132(10). Available at: <https://doi.org/10.1172/JCI155333>.

## Supplementary material

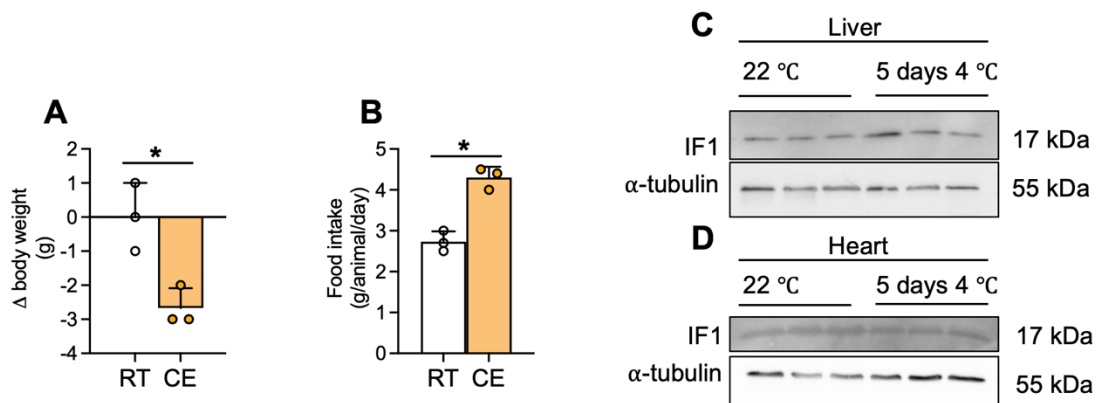

**Figure EV1 – Cold exposure induces body weight loss and does not alter IF1 levels in liver and heart.** (A) Change of body weight and (B) food intake during 5 days of cold exposure. IF1 protein levels in (C) liver and (D) heart after 5 days of cold exposure. IF1 - ATP synthase inhibitory factor subunit 1; Two-tailed Student's t-test (A, B). \*  $p < 0.05$ .

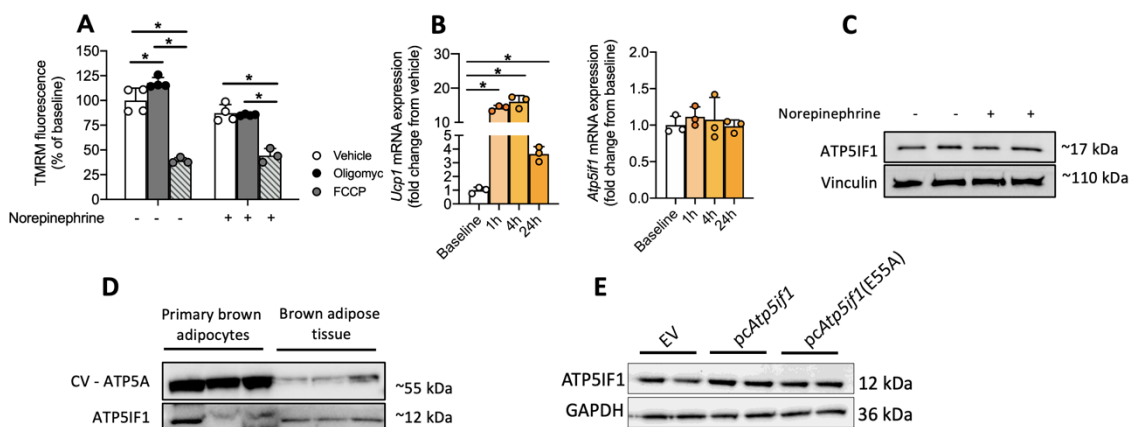

**Figure EV2 – Effects of oligomycin and FCCP on mitochondrial membrane potential.** (A) Brown adipocytes were pre-treated (30 min) with FCCP or oligomycin before the addition of norepinephrine. Norepinephrine treatment lasted 30 minutes before the cells were loaded with 20 nM TMRM. (B) mRNA levels of *Ucp1* and *Atp5if1* after 1h, 4h, and 24h of norepinephrine (10  $\mu$ M) treatment. (C) ATP5IF1 protein levels following norepinephrine stimulation (10  $\mu$ M for 1h). (D) Comparison between ATP5A and ATP5IF1 levels in differentiated primary brown adipocytes and brown adipose tissue. (E) Representative blot of IF1 mutant overexpression in differentiated WT1 brown adipocytes. FCCP - Carbonyl cyanide-p-trifluoromethoxyphenylhydrazone. Statistical test: one-way ANOVA followed by LSD post-hoc test. \*  $p < 0.05$ .

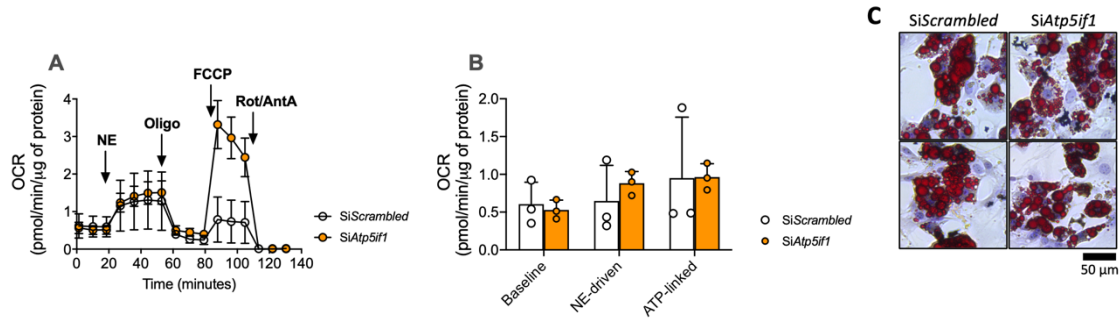

**Figure EV3 – Mitochondrial respiration in the presence of fatty acid-free BSA and lipid accumulation in IF1 knockdown adipocytes.** (A) Representative trace and (B) quantification of mitochondrial oxygen consumption rate in primary brown adipocytes knockdown for IF1 (*siAtp5if1*) or controls (*siScrambled*). (C) Lipid content upon *Atp5if1* silencing in primary brown adipocytes visualized by Oil Red O staining. *Atp5if1* – ATP synthase inhibitory factor subunit 1; OCR – oxygen consumption rate; NE – norepinephrine; Oligo – oligomycin; FCCP - carbonyl cyanide-p-trifluoromethoxyphenylhydrazine; Rot – rotenone; AA – antimycin A. Two-tailed Student's t-test. \*  $p < 0.05$ .

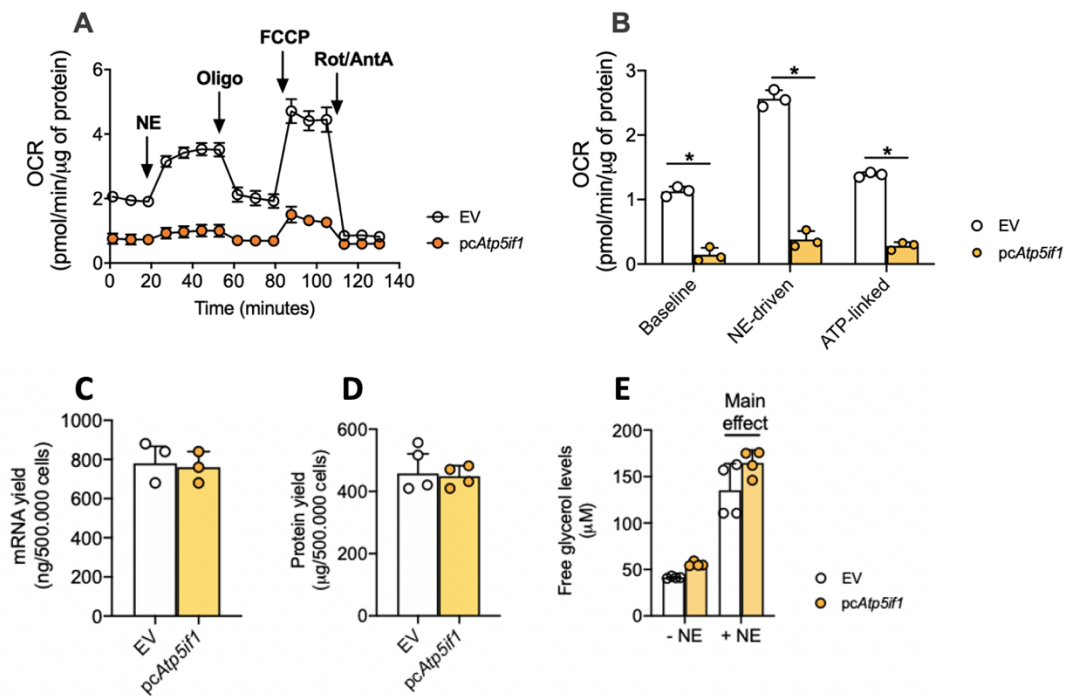

**Figure EV4 – IF1 overexpression suppresses mitochondrial respiration independent of free-fat acids and does not affect basic cell parameters in brown adipocytes.** (A) Representative trace and (B) quantification of mitochondrial oxygen consumption rate in primary brown adipocytes overexpressing IF1 (*pcAtp5if1*) or controls (EV). (C) mRNA and (D) protein yield from 500.000 cells overexpressing IF1. (E) Norepinephrine-induced lipolysis (10  $\mu$ M for 90 minutes) in IF1-overexpressing adipocytes. *Atp5if1* – ATP synthase inhibitory factor subunit 1; OCR – oxygen consumption rate; NE – norepinephrine; Oligo – oligomycin; FCCP - carbonyl cyanide-p-trifluoromethoxyphenylhydrazine; Rot – rotenone; AA – antimycin A. Two-tailed Student's t-test. \*  $p < 0.05$ .



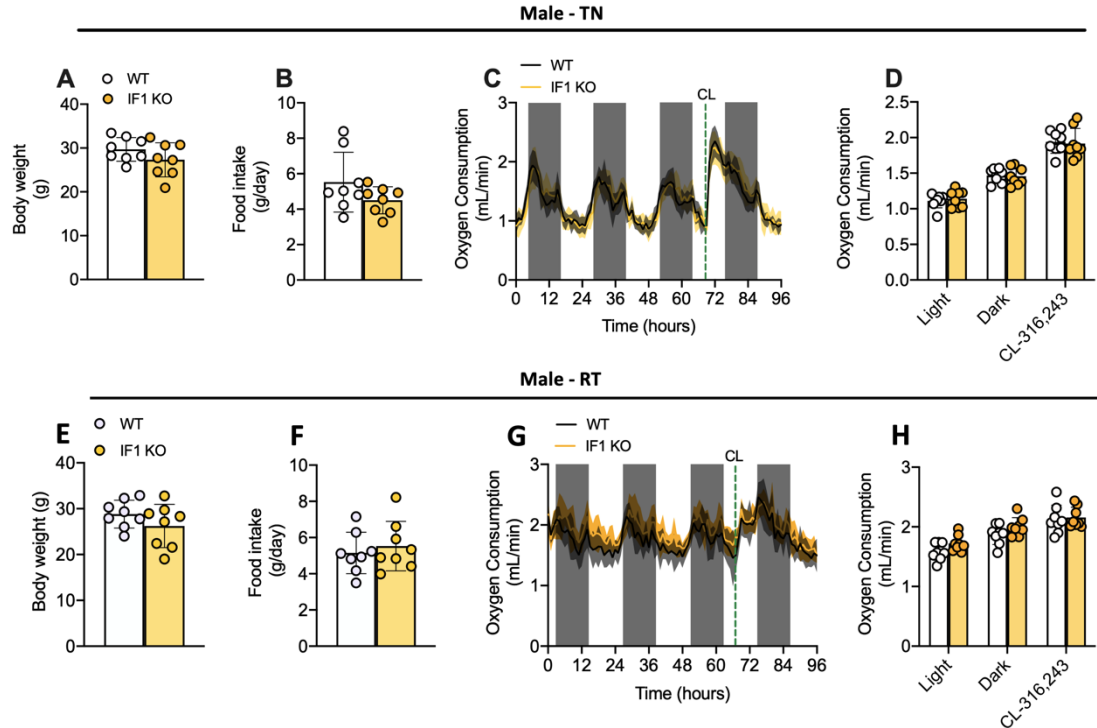

**Figure EV5 – IF1 global knockout does not affect resting and adrenergic-stimulated whole-body oxygen consumption.** (A) Body weight, (B) food intake, (C) real-time trace, and (D) average of baseline and CL316,243-induced energy expenditure in adult WT and IF1 KO male mice after 2 weeks of living at thermoneutrality. (E) Body weight, (F) food intake, (G) real-time trace, and (H) average of baseline and CL316,243-induced energy expenditure in adult WT and IF1 KO male mice after 2 weeks living at 23 °C. WT – wild-type; IF1 KO – Mice with global IF1 knockout; RT – room temperature; TN - thermoneutrality. Two-tailed Student's t-test. \* p<0.05.

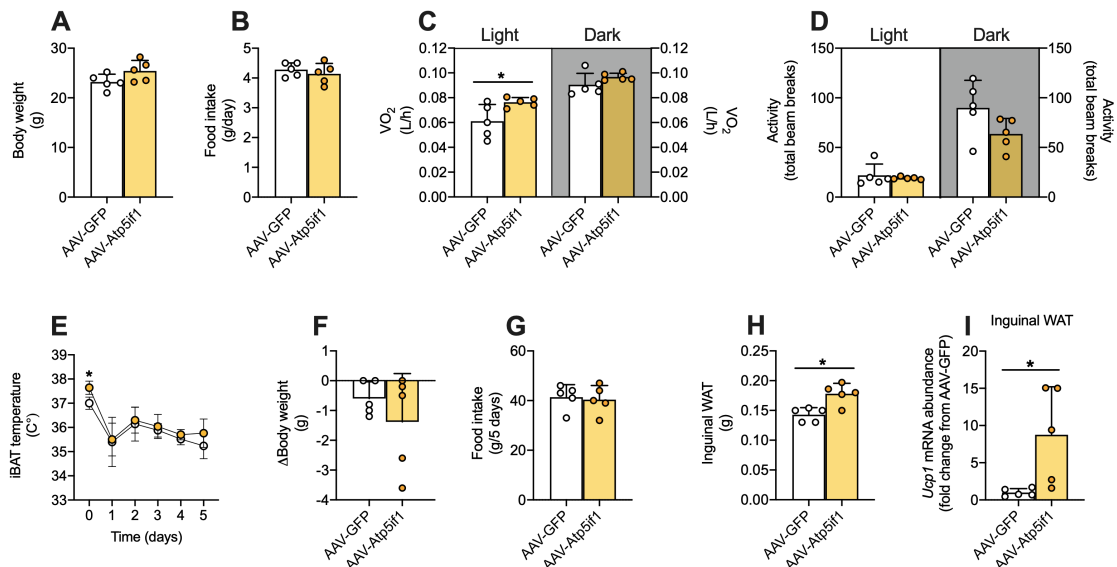

**Figure EV6 – Effects of BAT IF1 overexpression in male mice.** (A) Body weight and (B) daily food intake after 14 days of AAV transduction. (C) Oxygen consumption and (D) voluntary ambulatory activity in the dark and light cycles. (E) iBAT temperature at RT (day 0) and following cold exposure (4 °C). (F) Change of body weight and (G) food intake after 5 days of cold exposure (4 °C). (H) Inguinal WAT mass and (I) mRNA *Ucp1* levels after 5 days of cold exposure. WAT – white adipose tissue. Statistical test: Two-tailed Student's t-test. \* p<0.05.

**Supplementary Table 1: Primer sequences.**

| Gene                   | Forward sequence       | Reverse sequence       |
|------------------------|------------------------|------------------------|
| <i>Tbp</i>             | AGAACAATCCAGACTAGCAGCA | GGGAACTTCACATCACAGCTC  |
| <i>Atp5if1</i>         | GGTTCGGTGTCTGGGGTATG   | ATCCATGCTATCCGACGAGT   |
| <i>Ucp1</i>            | AGGCTTCCAGTACCATTAGGT  | CTGAGTGAGGCAAAGCTGATTT |
| <i>Virus titration</i> | CCCACTTGGCAGTACATCAA   | GCCAAGTAGGAAAGTCCCAT   |

**Supplementary Table 2: Antibodies.**

| Name_ID                        | Target antigen     | Clonality  | Vendor          | Cat Number | Dilution |
|--------------------------------|--------------------|------------|-----------------|------------|----------|
| ATP5IF1<br>AB_10949890         | ATP5IF1            | Polyclonal | Cell Signalling | 8528       | 1:500    |
| OxPhos<br>AB_2629281           | OXPPOS<br>Cocktail | Monoclonal | Abcam           | 110413     | 1:1000   |
| GAPDH<br>AB_10622025           | GAPDH              | Monoclonal | Cell Signalling | 5174       | 1:2000   |
| p38MAPK<br>AB_330713           | p38MAPK            | Polyclonal | Cell Signalling | 9212       | 1:2000   |
| p-p38MAPK<br>AB_331641         | p-p38MAPK          | Polyclonal | Cell Signalling | 9211       | 1:1000   |
| Vinculin<br>AB_10559207        | Vinculin           | Unknown    | Cell Signalling | 4650       | 1:5000   |
| $\alpha$ -tubulin<br>AB_477582 | $\alpha$ -tubulin  | Monoclonal | Sigma-Aldrich   | 6074       | 1:2000   |

## Supplementary Fig. 1: Uncropped immunoblots

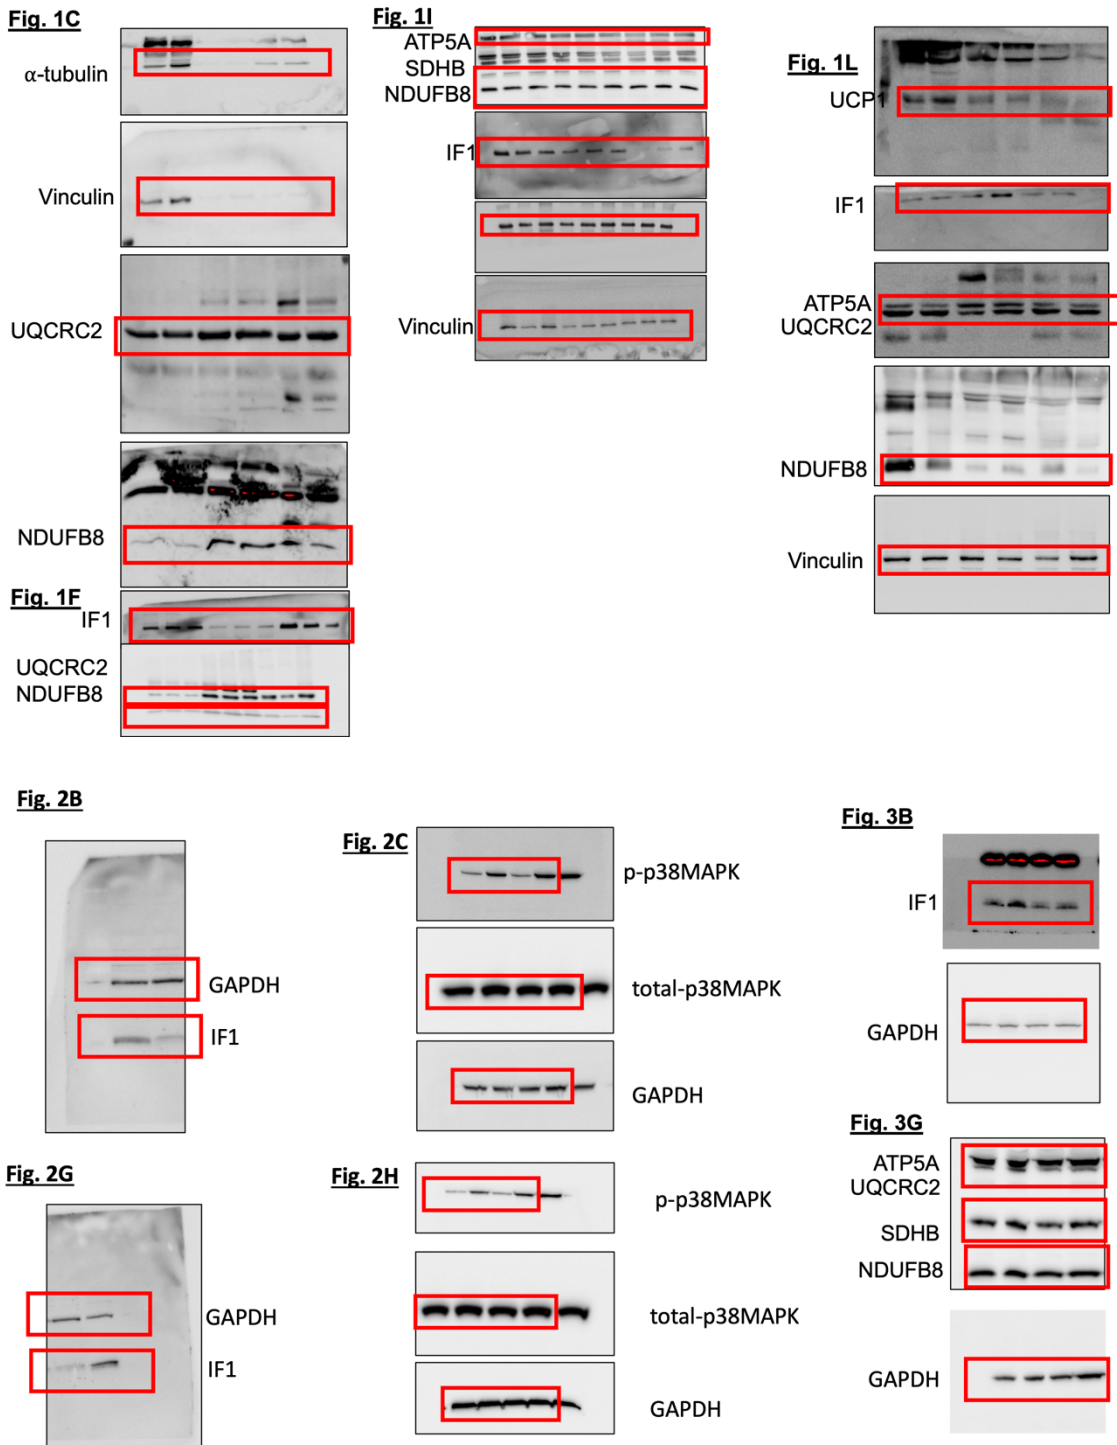

**Fig. 4B**

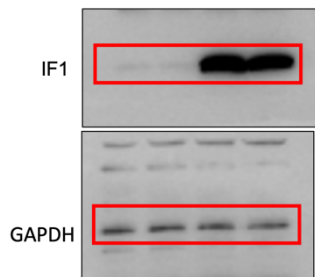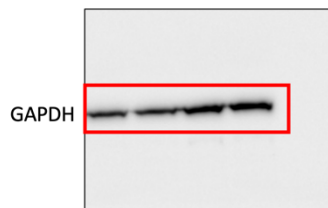

**Fig. 5J**

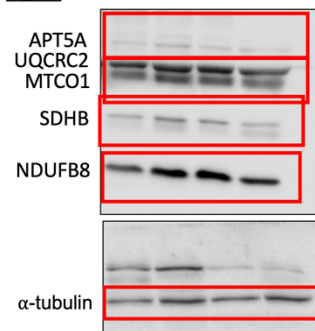

**Fig. 4I**

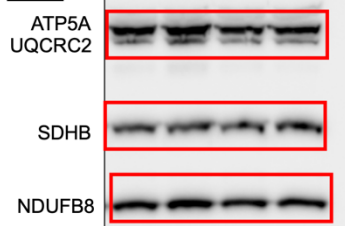

**Fig. 5C**

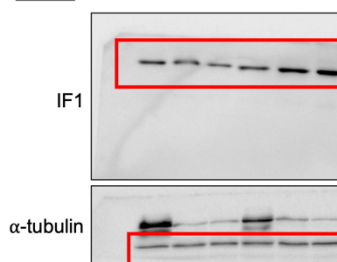

**Fig. EV1C**

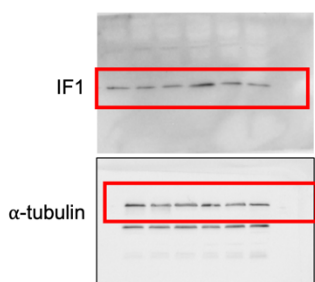

**Fig. EV1C**

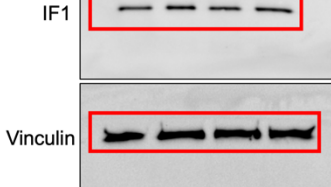

**Fig. EV1E**

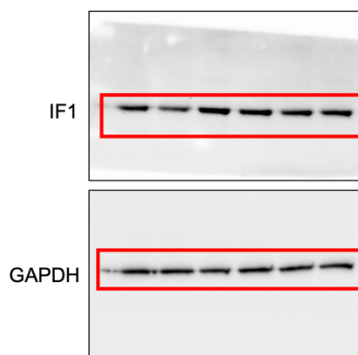

**Fig. EV1D**

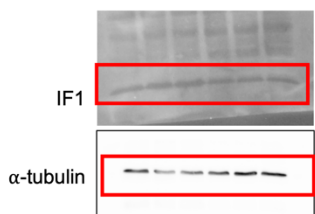

**Fig. EV1D**

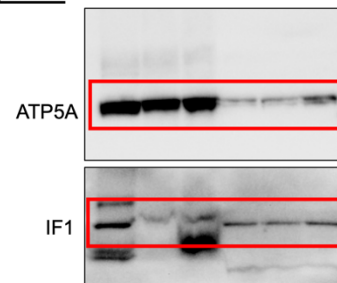



# Regulation of mitochondrial membrane potential

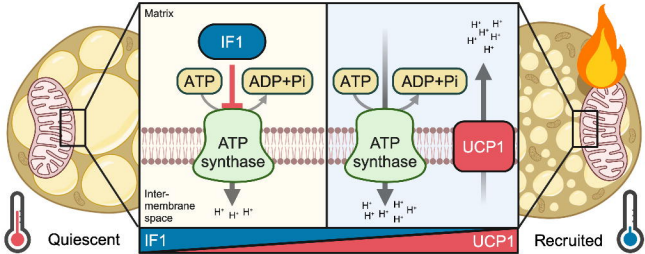

Source: https://www.biorxiv.org/content/biorxiv/early/2024/04/20/2023.07.27.550888.full.pdf
